# Supplementary material for: Tracing fluid transfers in subduction zones: an integrated thermodynamic and δ 18 O fractionation modelling approach
Source: Copernicus journal article supplement (doi:10.5194/se-11-307-2020), 2020-03-10
Supplement: Supplementary file 1 [file se-11-307-2020-supplement.zip]

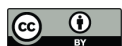

## *Supplement of*

# **Tracing fluid transfers in subduction zones: an integrated thermodynamic and $\delta^{18}\text{O}$ fractionation modelling approach**

**Alice Vho et al.**

*Correspondence to:* Alice Vho ([alice.vho@geo.unibe.ch](mailto:alice.vho@geo.unibe.ch))

- [se-11-307-2020-supplement-title-page.pdf](#)
- [S1\\_tc55Serp.txt](#)
- [S2\\_InputData.docx](#)
- [S2\\_InputData.pdf](#)
- [S3\\_Results.xlsx](#)
- [S4\\_Discussion.xlsx](#)

The copyright of individual parts of the supplement might differ from the CC BY 4.0 License.
