# Supplementary material for: Tracing fluid transfers in subduction zones: an integrated thermodynamic and δ 18 O fractionation modelling approach
Source: Copernicus journal article supplement (doi:10.5194/se-11-307-2020), 2020-03-10
Supplement: Supplementary file 2 [file S3_Results.xlsx]

## Sheet: bas(a)-sed(t) (1)
Metabasalt(a), no input of serpentinite-derived fluid
	calcite		phengite		tremolite		glaucophane		lawsonite		titanite		quartz		aragonite		water		omphacite		rutile		garnet		talc		zoisite		kyanite		diopside		bulk δ18O
T (°C)	vol.%	δ18O	vol.%	δ18O	vol.%	δ18O	vol.%	δ18O	vol.%	δ18O	vol.%	δ18O	vol.%	δ18O	vol.%	δ18O	vol.%	δ18O	vol.%	δ18O	vol.%	δ18O	vol.%	δ18O	vol.%	δ18O	vol.%	δ18O	vol.%	δ18O	vol.%	δ18O
350	3.67803	13.858	5.22094	9.94503	24.834	8.45948	22.1513	8.88131	36.5061	8.49572	2.34302	7.45299	1.73795	14.0646	3.21939	11.5271	0.30924	8.87496	-	-	-	-	-	-	-	-	-	-	-	-	-	-	9
375	6.75912	13.4595	5.23983	9.7156	23.1441	8.32346	15.8385	8.71033	36.3668	8.40627	2.35506	7.36746	2.2861	13.626	-	-	0.593724	9.03328	7.41681	9.32614	-	-	-	-	-	-	-	-	-	-	-	-	9.00026
400	6.79919	13.2408	5.26733	9.65063	23.3788	8.34299	15.7537	8.69702	36.6086	8.46488	2.36952	7.43229	2.3041	13.371	-	-	0	0	7.51876	9.28547	-	-	-	-	-	-	-	-	-	-	-	-	9.00014
420	6.79816	13.0775	5.26959	9.60216	23.4843	8.35869	15.5688	8.68865	36.5027	8.50507	2.36924	7.47875	2.30901	13.1827	-	-	0.0355416	9.47966	7.66266	9.25338	-	-	-	-	-	-	-	-	-	-	-	-	9.00014
440	6.79943	12.925	5.27373	9.55747	23.5992	8.37441	15.3641	8.68149	36.3871	8.5411	2.36972	7.522	2.31393	13.0078	-	-	0.0434251	9.6408	7.84937	9.22275	-	-	-	-	-	-	-	-	-	-	-	-	9.00003
460	6.80137	12.7826	5.27851	9.51641	23.7248	8.38992	15.1227	8.67489	36.2733	8.57371	2.37044	7.56257	2.32078	12.8451	-	-	0.0453383	9.7836	8.06281	9.1939	-	-	-	-	-	-	-	-	-	-	-	-	8.99983
480	6.81424	12.6228	5.29135	9.45238	24.2049	8.37931	10.8024	8.64276	36.0628	8.57705	-	-	2.58411	12.6674	-	-	0.313312	9.88245	13.1161	9.13007	0.810857	5.13437	-	-	-	-	-	-	-	-	-	-	8.99959
500	6.83256	12.4595	5.31114	9.37892	21.205	8.35508	8.63857	8.59749	32.7565	8.56531	-	-	3.62991	12.4874	-	-	1.326	9.95634	15.8647	9.1029	0.813415	5.2158	3.62219	7.66935	-	-	-	-	-	-	-	-	8.99765
520	7.18347	12.2725	5.59646	9.27698	17.3762	8.29865	4.64499	8.52142	28.6217	8.51997	-	-	5.63343	12.2853	-	-	2.28707	9.98645	21.6058	9.06685	0.855498	5.25873	6.1954	7.63141	-	-	-	-	-	-	-	-	9.04297
540	7.8458	12.1283	6.12531	9.21366	16.9875	8.27872	1.78613	8.48254	28.0436	8.50873	-	-	7.15876	12.1278	-	-	1.27033	10.0417	26.5296	9.04433	0.9347	5.33124	3.31823	7.62462	-	-	-	-	-	-	-	-	9.12977
560	8.22017	12.0089	6.425	9.17106	16.3083	8.27327	-	-	27.3373	8.5142	-	-	8.13124	11.9966	-	-	0.807366	10.1056	29.7445	9.02739	0.979579	5.41627	2.04644	7.63213	-	-	-	-	-	-	-	-	9.17792
580	8.4592	11.9068	6.60764	9.14195	14.4948	8.27322	-	-	26.7095	8.52964	-	-	8.7955	11.884	-	-	0.558478	10.1723	31.9704	9.01005	1.00836	5.50738	1.39608	7.64844	-	-	-	-	-	-	-	-	9.20779
600	8.62529	11.8134	6.73468	9.11786	12.7775	8.27798	-	-	26.0013	8.54673	-	-	9.34345	11.781	-	-	0.48474	10.2344	33.8052	8.99542	1.02846	5.59654	1.19934	7.66235	-	-	-	-	-	-	-	-	9.228
620	8.65305	11.5873	6.76473	8.95805	-	-	-	-	10.1162	8.42494	-	-	10.4108	11.5464	-	-	3.98963	10.1521	37.78	8.85315	1.03207	5.54348	1.48884	7.53205	7.24945	8.82052	12.5153	8.46767	-	-	-	-	9.24524
640	9.06263	11.4646	7.06388	8.89823	-	-	-	-	-	-	-	-	11.6373	11.416	-	-	3.00575	10.1621	40.8797	8.79016	1.08124	5.58482	0.404461	7.50283	6.3798	8.75169	18.7284	8.42663	1.75688	8.85075	-	-	9.24777
660	9.4109	11.3257	7.29757	8.81913	-	-	-	-	-	-	-	-	12.3183	11.2702	-	-	1.32644	10.2122	43.1431	8.66323	1.12307	5.60166	-	-	-	-	9.35116	8.36539	6.85477	8.76957	9.17465	8.57228	9.23572
680	9.53849	11.3048	7.37713	8.85558	-	-	-	-	-	-	-	-	12.4793	11.2431	-	-	3.53516e-05	10.2722	47.8855	8.69616	1.13846	5.72884	-	-	-	-	9.44984	8.41847	6.9557	8.80398	5.17203	8.61631	9.22628
700	9.54013	11.2859	7.36147	8.89172	-	-	-	-	-	-	-	-	12.4752	11.2187	-	-	3.09331e-05	10.3263	53.0971	8.73332	1.13878	5.85102	-	-	-	-	9.41892	8.47025	6.96535	8.83828	-	-	9.22626
Metasediment(t), no iinput of serpentinite-derived fluid in the metabasalt
	omphacite				phengite				glaucophane				lawsonite				titanite				quartz				water				jadeite				rutile				garnet				bulk δ18O	bulk δ18O	bulk δ18O
T (°C)	vol.%a	δ18Oa	δ18Ob	δ18Oc	vol.%a	δ18Oa	δ18Ob	δ18Oc	vol.%a	δ18Oa	δ18Ob	δ18Oc	vol.%a	δ18Oa	δ18Ob	δ18Oc	vol.%a	δ18Oa	δ18Ob	δ18Oc	vol.%a	δ18Oa	δ18Ob	δ18Oc	vol.%a	δ18Oa	δ18Ob	δ18Oc	vol.%a	δ18Oa	δ18Ob	δ18Oc	vol.%a	δ18Oa	δ18Ob	δ18Oc	vol.%a	δ18Oa	δ18Ob	δ18Oc	δ18Oa	δ18Ob	δ18Oc
350	11.454	14.927	14.8894	14.8524	36.6422	15.2361	15.1985	15.1615	30.1126	14.1786	14.141	14.1039	9.3835	13.7868	13.7492	13.7122	1.43852	12.7441	12.7065	12.6695	8.15158	19.3556	19.3181	19.281	2.81767	14.1675	14.1299	14.0929	-	-	-		-	-	-	-	-	-	-	-	15	14.9565	14.9137
375	11.735	14.9426	14.8324	14.7225	37.6574	15.2121	15.1015	14.9917	31.0101	14.2162	14.104	13.9942	9.67063	13.9026	13.7921	13.6823	1.48094	12.8638	12.7533	12.6434	8.38377	19.1224	19.0118	18.902	-	-	14.4147	14.3049	0.0621096	15.6909	15.5808	15.471	-	-	-	-	-	-	-	-	15.0169	14.8966	14.7802
400	11.6312	14.9545	14.844	14.7342	37.6095	15.1908	15.08	14.9702	31.0353	14.2507	14.1383	14.0285	9.68617	14.0049	13.8941	13.7843	1.48165	12.9723	12.8615	12.7517	8.37702	18.9111	18.8003	18.6904	-	-	-	-	0.179265	15.6256	15.5154	15.4055	-	-	-	-	-	-	-	-	15.0169	14.9032	14.7934
420	11.5576	14.9628	14.8459	14.7316	37.6401	15.1757	15.0587	14.9444	31.0095	14.2738	14.156	14.0417	9.68007	14.0783	13.9613	13.847	1.48184	13.052	12.935	12.8207	8.38215	18.756	18.6389	18.5246	-	-	14.9319	14.8176	0.248757	15.574	15.4572	15.3429	-	-	-	-	-	-	-	-	15.0169	14.8986	14.7844
440	12.0868	14.964	14.84	14.7203	37.6469	15.1566	15.0325	14.9128	30.9569	14.293	14.1689	14.0492	9.25102	14.1398	14.0158	13.8961	1.48097	13.1207	12.9967	12.877	8.45079	18.6065	18.4825	18.3628	0.12663	15.2357	15.1117	14.992	-	-	-	-	-	-	-	-	-	-	-	-	15.0169	14.8931	14.7736
460	12.3861	14.9564	14.8263	14.7009	37.6865	15.139	15.009	14.8835	30.9531	14.3114	14.1814	14.0559	8.84467	14.1959	14.0658	13.9404	1.48205	13.1847	13.0547	12.9293	8.52329	18.4673	18.3373	18.2118	0.124256	15.402	15.272	15.1466	-	-	-	-	-	-	-	-	-	-	-	-	15.0167	14.8871	14.762
480	15.5773	14.9137	14.7422	14.5779	37.7371	15.1079	14.9365	14.7721	28.6709	14.3135	14.142	13.9776	8.55874	14.2322	14.0607	13.8963	-	-	-	-	8.71721	18.3225	18.1511	17.9867	0.231573	15.5356	15.3641	15.1997	-	-	-	-	0.507082	10.7895	10.618	10.4537	-	-	-	-	15.0163	14.8488	14.6882
500	15.9542	14.9079	14.5645	14.2484	37.8246	15.0926	14.7492	14.4331	28.6718	14.3291	13.9857	13.6696	8.08283	14.2785	13.9351	13.619	-	-	-	-	8.81201	18.2006	17.8572	17.5411	0.146418	15.6676	15.3242	15.0081	-	-	-	-	0.508106	10.929	10.5856	10.2695	-	-	-	-	15.0154	14.6923	14.3952
520	17.4865	14.8633	14.2526	13.7248	38.0208	14.9664	14.3558	13.828	18.243	14.2325	13.6219	13.0941	0.171989	14.2087	13.598	13.0702	-	-	-	-	11.0878	17.974	17.3634	16.8356	2.95385	15.6732	15.0626	14.5348	4.51042	15.209	14.5983	14.0706	0.507545	10.9474	10.3368	9.809	7.01812	13.3322	12.7215	12.1937	15.0148	14.437	13.939
540	17.1919	14.8811	14.122	13.4838	42.1799	14.9592	14.2001	13.5619	18.4416	14.2432	13.4841	12.8458	-	-	-	-	-	-	-	-	12.5335	17.8727	17.1136	16.4754	0.178035	15.7847	15.0256	14.3874	7.76025	15.1847	14.4256	13.7874	0.564938	11.0762	10.3171	9.67884	1.14991	13.388	12.6289	11.9906	15.1462	14.4056	13.7848
560	14.8923	14.9012	14.0516	13.3487	42.7051	14.9547	14.1051	13.4022	17.0308	14.255	13.4055	12.7025	-	-	-	-	-	-	-	-	12.8635	17.7797	16.9301	16.2272	0.110014	15.8868	15.0373	14.3343	10.8791	15.163	14.3134	13.6105	0.573735	11.1994	10.3498	9.64691	0.945483	13.4412	12.5916	11.8887	15.1684	14.3318	13.6414
580	12.1099	14.9213	14.0106	13.2652	43.1284	14.9501	14.0394	13.294	15.5257	14.2657	13.355	12.6096	-	-	-	-	-	-	-	-	13.1558	17.6916	16.7809	16.0355	0.10995	15.9782	15.0675	14.322	14.5086	15.1419	14.2312	13.4858	0.581018	11.315	10.4043	9.6589	0.880534	13.4896	12.5789	11.8335	15.1865	14.2856	13.5496
600	8.46988	14.9426	13.9796	13.1987	43.5359	14.946	13.983	13.202	14.0304	14.2758	13.3128	12.5319	-	-	-	-	-	-	-	-	13.4305	17.6086	16.6456	15.8646	0.106524	16.0602	15.0972	14.3163	19.035	15.1208	14.1578	13.3768	0.587949	11.4241	10.4611	9.68017	0.80386	13.534	12.571	11.7901	15.2029	14.249	13.477
620	2.67986	14.9665	13.5923	12.5806	43.9175	14.9424	13.5682	12.5566	12.5833	14.2856	12.9114	11.8998	-	-	-	-	-	-	-	-	13.6836	17.5304	16.1562	15.1445	0.100711	16.1342	14.76	13.7484	25.7142	15.0982	13.724	12.7124	0.594413	11.5274	10.1532	9.14159	0.726362	13.5751	12.2009	11.1893	15.2176	13.9185	12.9705
640	-	-	-	-	44.2736	14.9396	13.2813	12.1343	11.2039	14.2956	12.6373	11.4903	-	-	-	-	-	-	-	-	13.9138	17.4567	15.7985	14.6514	0.0939294	16.2011	14.5428	13.3958	29.2626	15.1018	13.4436	12.2966	0.600409	11.6255	9.96724	8.82023	0.651774	13.6135	11.9553	10.8083	15.2305	13.6314	12.5367
660	-	-	-	-	44.6015	14.9374	13.1585	11.9577	9.89841	14.3059	12.527	11.3261	-	-	-	-	-	-	-	-	14.1211	17.3874	15.6086	14.4077	0.0872975	16.2617	14.4828	13.282	30.0999	15.1149	13.336	12.1351	0.605859	11.7189	9.94003	8.73917	0.585863	13.6498	11.8709	10.6701	15.2419	13.4906	12.3159
680	-	-	-	-	44.9016	14.936	13.1569	11.9559	8.6624	14.3163	12.5371	11.3361	-	-	-	-	-	-	-	-	14.3082	17.3223	15.5431	14.3421	0.0808509	16.3167	14.5375	13.3365	30.9044	15.1258	13.3466	12.1456	0.610857	11.808	10.0288	8.82785	0.531623	13.6841	11.9049	10.7039	15.252	13.4728	12.2719
700	-	-	-	-	45.1773	14.9353	13.1558	11.9547	7.49586	14.3269	12.5474	11.3463	-	-	-	-	-	-	-	-	14.4773	17.2608	15.4814	14.2802	0.075759	16.3667	14.5872	13.3861	31.6742	15.135	13.3555	12.1543	0.615466	11.8932	10.1137	8.91255	0.4841	13.7166	11.9372	10.736	15.2609	13.4815	12.2804
a No Interaction case
b Partial Interaction case
c High Interaction case

## Sheet: bas(a)-sed(t) (2)
Metabasalt(a), input of serpentinite-derived fluid
	calcite			phengite			tremolite			glaucophane			lawsonite			titanite			quartz			aragonite			water			omphacite			rutile			garnet			talc			zoisite			kyanite			diopside			bulk δ18O
T (°C)	δ18Oa	δ18Ob	δ18Oc	δ18Oa	δ18Ob	δ18Oc	δ18Oa	δ18Ob	δ18Oc	δ18Oa	δ18Ob	δ18Oc	δ18Oa	δ18Ob	δ18Oc	δ18Oa	δ18Ob	δ18Oc	δ18Oa	δ18Ob	δ18Oc	δ18Oa	δ18Ob	δ18Oc	δ18Oa	δ18Ob	δ18Oc	δ18Oa	δ18Ob	δ18Oc	δ18Oa	δ18Ob	δ18Oc	δ18Oa	δ18Ob	δ18Oc	δ18Oa	δ18Ob	δ18Oc	δ18Oa	δ18Ob	δ18Oc	δ18Oa	δ18Ob	δ18Oc	δ18Oa	δ18Ob	δ18Oc	δ18Oa
350	13.8566	13.8566	13.8566	9.94357	9.94357	9.94357	8.45806	8.45806	8.45806	8.8799	8.8799	8.8799	8.49426	8.49426	8.49426	7.45154	7.45154	7.45154	14.0631	14.0631	14.0631	11.5256	11.5256	11.5256	8.87496	8.87496	8.87496	-	-	-	-	-	-	-	-	-	-	-	-	-	-	-	-	-	-	-	-	-	9
375	13.4639	13.4639	13.4639	9.71994	9.71994	9.71994	8.32778	8.32778	8.32778	8.71464	8.71464	8.71464	8.41061	8.41061	8.41061	7.3718	7.3718	7.3718	13.6303	13.6303	13.6303	-	-	-	9.03328	9.03328	9.03328	9.33106	9.33106	9.33106	-	-	-	-	-	-	-	-	-	-	-	-	-	-	-	-	-	-	9.00027
400	13.2449	13.2449	13.2449	9.65477	9.65477	9.65477	8.34712	8.34712	8.34712	8.70116	8.70116	8.70116	8.46902	8.46902	8.46902	7.43642	7.43642	7.43642	13.3752	13.3752	13.3752	-	-	-	-	-	-	9.29021	9.29021	9.29021	-	-	-	-	-	-	-	-	-	-	-	-	-	-	-	-	-	-	9.00014
420	13.0815	13.0815	13.0815	9.60615	9.60615	9.60615	8.36266	8.36266	8.36266	8.69262	8.69262	8.69262	8.50906	8.50906	8.50906	7.48274	7.48274	7.48274	13.1867	13.1867	13.1867	-	-	-	9.47966	9.47966	9.47966	9.25799	9.25799	9.25799	-	-	-	-	-	-	-	-	-	-	-	-	-	-	-	-	-	-	9.00014
440	12.9289	12.9289	12.9289	9.56132	9.56132	9.56132	8.37823	8.37823	8.37823	8.68531	8.68531	8.68531	8.54495	8.54495	8.54495	7.52584	7.52584	7.52584	13.0116	13.0116	13.0116	-	-	-	9.6408	9.6408	9.6408	9.22722	9.22722	9.22722	-	-	-	-	-	-	-	-	-	-	-	-	-	-	-	-	-	-	9.00002
460	12.7863	12.7863	12.7863	9.52012	9.52012	9.52012	8.39361	8.39361	8.39361	8.67859	8.67859	8.67859	8.57742	8.57742	8.57742	7.56628	7.56628	7.56628	12.8488	12.8488	12.8488	-	-	-	9.7836	9.7836	9.7836	9.19823	9.19823	9.19823	-	-	-	-	-	-	-	-	-	-	-	-	-	-	-	-	-	-	8.99983
480	12.6012	12.5777	12.5314	9.4307	9.40723	9.36089	8.35764	8.33416	8.28782	8.62109	8.59761	8.55127	8.55537	8.5319	8.48556	-	-	-	12.6457	12.6223	12.5759	-	-	-	9.85877	9.8353	9.78896	9.1084	9.08492	9.03858	5.1127	5.08922	5.04288	-	-	-	-	-	-	-	-	-	-	-	-	-	-	-	8.97978
500	12.4378	12.4143	12.3679	9.3572	9.33373	9.28739	8.33335	8.30988	8.26354	8.57577	8.55229	8.50595	8.54358	8.52011	8.47377	-	-	-	12.4657	12.4422	12.3958	-	-	-	9.93266	9.90918	9.86284	9.08118	9.0577	9.01136	5.19408	5.1706	5.12426	7.64762	7.62415	7.57781	-	-	-	-	-	-	-	-	-	-	-	-	8.97386
520	12.2507	12.2273	12.1809	9.25522	9.23175	9.18541	8.2769	8.25342	8.20708	8.49966	8.47618	8.42985	8.49821	8.47473	8.42839	-	-	-	12.2636	12.2401	12.1937	-	-	-	9.96276	9.93929	9.89295	9.04509	9.02162	8.97528	5.23697	5.2135	5.16716	7.60965	7.58618	7.53984	-	-	-	-	-	-	-	-	-	-	-	-	9.01905
540	12.1065	12.083	12.0367	9.19188	9.16841	9.12207	8.25694	8.23347	8.18713	8.46076	8.43728	8.39094	8.48695	8.46348	8.41714	-	-	-	12.106	12.0826	12.0362	-	-	-	10.018	9.9945	9.94816	9.02255	8.99907	8.95273	5.30946	5.28598	5.23964	7.60284	7.57937	7.53303	-	-	-	-	-	-	-	-	-	-	-	-	9.1056
560	11.9871	11.9636	11.9173	9.14925	9.12577	9.07943	8.25146	8.22799	8.18165	-	-	-	8.49239	8.46892	8.42258	-	-	-	11.9748	11.9513	11.905	-	-	-	10.0819	10.0584	10.0121	9.00558	8.98211	8.93577	5.39446	5.37098	5.32464	7.61032	7.58684	7.5405	-	-	-	-	-	-	-	-	-	-	-	-	9.15361
580	11.885	11.8615	11.8151	9.12007	9.0966	9.05026	8.25135	8.22787	8.18153	-	-	-	8.50776	8.48428	8.43794	-	-	-	11.8621	11.8387	11.7923	-	-	-	10.1486	10.1252	10.0788	8.98819	8.96472	8.91838	5.4855	5.46203	5.41569	7.62656	7.60309	7.55675	-	-	-	-	-	-	-	-	-	-	-	-	9.18338
600	11.7914	11.7679	11.7216	9.09591	9.07243	9.02609	8.25602	8.23254	8.1862	-	-	-	8.52478	8.5013	8.45496	-	-	-	11.7591	11.7356	11.6893	-	-	-	10.2107	10.1872	10.1409	8.97345	8.94998	8.90364	5.57459	5.55112	5.50478	7.64041	7.61693	7.57059	-	-	-	-	-	-	-	-	-	-	-	-	9.20353
620	11.5655	11.542	11.4956	8.93617	8.9127	8.86636	-	-	-	-	-	-	8.40306	8.37958	8.33324	-	-	-	11.5245	11.5011	11.4547	-	-	-	10.1284	10.1049	10.0586	8.83126	8.80779	8.76145	5.5216	5.49812	5.45178	7.51017	7.4867	7.44036	8.79864	8.77517	8.72883	8.44579	8.42231	8.37597	-	-	-	-	-	-	9.22071
640	11.4427	11.4192	11.3729	8.87628	8.8528	8.80646	-	-	-	-	-	-	-	-	-	-	-	-	11.3941	11.3706	11.3243	-	-	-	10.1385	10.115	10.0686	8.76821	8.74473	8.69839	5.56286	5.53939	5.49305	7.48088	7.4574	7.41107	8.72974	8.70627	8.65993	8.40467	8.3812	8.33486	8.82879	8.80532	8.75898	-	-	-	9.22314
660	11.2809	11.1307	10.8879	8.7743	8.62411	8.38134	-	-	-	-	-	-	-	-	-	-	-	-	11.2254	11.0752	10.8324	-	-	-	10.0996	9.94943	9.70665	8.6184	8.46822	8.22544	5.55683	5.40664	5.16387	-	-	-	-	-	-	8.32056	8.17038	7.9276	8.72473	8.57455	8.33177	8.45965	8.30947	8.06669	9.13734
680	11.2268	11.0766	10.8338	8.7776	8.62741	8.38463	-	-	-	-	-	-	-	-	-	-	-	-	11.1651	11.0149	10.7721	-	-	-	10.1595	10.0094	9.76657	8.61818	8.46799	8.22521	5.65085	5.50067	5.25789	-	-	-	-	-	-	8.34049	8.1903	7.94752	8.726	8.57581	8.33303	8.50368	8.3535	8.11072	9.11284
700	11.1751	11.0249	10.7821	8.78088	8.6307	8.38792	-	-	-	-	-	-	-	-	-	-	-	-	11.1079	10.9577	10.7149	-	-	-	10.2137	10.0635	9.82074	8.62247	8.47228	8.2295	5.74019	5.59	5.34722	-	-	-	-	-	-	8.35942	8.20923	7.96645	8.72745	8.57726	8.33448	-	-	-	9.11281
Metasediment(t), input of serpentinite-derived fluid in the metabasalt
	omphacite			phengite			glaucophane			lawsonite			titanite			quartz			water			jadeite			rutile			garnet			bulk δ18O	bulk δ18O	bulk δ18O
T (°C)	δ18Oa	δ18Ob	δ18Oc	δ18Oa	δ18Ob	δ18Oc	δ18Oa	δ18Ob	δ18Oc	δ18Oa	δ18Ob	δ18Oc	δ18Oa	δ18Ob	δ18Oc	δ18Oa	δ18Ob	δ18Oc	δ18Oa	δ18Ob	δ18Oc	δ18Oa	δ18Ob	δ18Oc	δ18Oa	δ18Ob	δ18Oc	δ18Oa	δ18Ob	δ18Oc	δ18Oa	δ18Ob	δ18Oc
350	14.8508	14.8508	14.8508	15.1599	15.1599	15.1599	14.1024	14.1024	14.1024	13.7106	13.7106	13.7106	12.6679	12.6679	12.6679	19.2794	19.2794	19.2794	14.0913	14.0913	14.0913	-	-	-	-	-	-	-	-	-	14.9118	14.9118	14.9118
375	14.7268	14.7268	14.7268	14.996	14.996	14.996	13.9985	13.9985	13.9985	13.6865	13.6865	13.6865	12.6477	12.6477	12.6477	18.9062	18.9062	18.9062	14.3092	14.3092	14.3092	15.4753	15.4753	15.4753	-	-	-	-	-	-	14.785	14.785	14.785
400	14.7385	14.7385	14.7385	14.9745	14.9745	14.9745	14.0328	14.0328	14.0328	13.7885	13.7885	13.7885	12.7559	12.7559	12.7559	18.6947	18.6947	18.6947	-	-	-	15.4098	15.4098	15.4098	-	-	-	-	-	-	14.7977	14.7977	14.7977
420	14.7359	14.7359	14.7359	14.9487	14.9487	14.9487	14.046	14.046	14.046	13.8513	13.8513	13.8513	12.825	12.825	12.825	18.529	18.529	18.529	14.8219	14.8219	14.8219	15.3473	15.3473	15.3473	-	-	-	-	-	-	14.7887	14.7887	14.7887
440	14.7245	14.7245	14.7245	14.9171	14.9171	14.9171	14.0535	14.0535	14.0535	13.9003	13.9003	13.9003	12.8812	12.8812	12.8812	18.367	18.367	18.367	14.9962	14.9962	14.9962	-	-	-	-	-	-	-	-	-	14.7779	14.7779	14.7779
460	14.7052	14.7052	14.7052	14.8878	14.8878	14.8878	14.0602	14.0602	14.0602	13.9447	13.9447	13.9447	12.9336	12.9336	12.9336	18.2161	18.2161	18.2161	15.1509	15.1509	15.1509	-	-	-	-	-	-	-	-	-	14.7663	14.7663	14.7663
480	14.422	14.2735	13.9965	14.6163	14.4677	14.1907	13.8218	13.6732	13.3963	13.7405	13.5919	13.315	-	-	-	17.8309	17.6823	17.4054	15.0439	14.8953	14.6184	-	-	-	10.2978	10.1493	9.87232	-	-	-	14.5477	14.4132	14.1621
500	14.1008	13.9598	13.6967	14.2855	14.1444	13.8814	13.522	13.3809	13.1179	13.4714	13.3304	13.0673	-	-	-	17.3935	17.2525	16.9894	14.8605	14.7195	14.4564	-	-	-	10.1219	9.98089	9.71782	-	-	-	14.2476	14.1066	13.8435
520	13.5895	13.4597	13.2172	13.6927	13.5628	13.3204	12.9588	12.8289	12.5865	12.9349	12.8051	12.5626	-	-	-	16.7003	16.5704	16.328	14.3995	14.2696	14.0272	13.9353	13.8054	13.563	9.67369	9.54384	9.3014	12.0584	11.9286	11.6861	13.8037	13.6738	13.4314
540	13.3551	13.2312	12.9998	13.4331	13.3092	13.0778	12.7171	12.5932	12.3618	-	-	-	-	-	-	16.3467	16.2228	15.9914	14.2586	14.1347	13.9033	13.6587	13.5348	13.3034	9.55011	9.42623	9.1948	11.8619	11.738	11.5066	13.656	13.5321	13.3007
560	13.2238	13.1034	12.8786	13.2773	13.157	12.9321	12.5777	12.4573	12.2324	-	-	-	-	-	-	16.1023	15.982	15.7571	14.2095	14.0891	13.8642	13.4856	13.3653	13.1404	9.52202	9.40169	9.17681	11.7638	11.6435	11.4186	13.5165	13.3961	13.1713
580	13.1429	13.0249	12.8044	13.1717	13.0537	12.8332	12.4873	12.3693	12.1488	-	-	-	-	-	-	15.9132	15.7952	15.5747	14.1997	14.0817	13.8612	13.3635	13.2455	13.0249	9.53659	9.41862	9.19809	11.7112	11.5932	11.3727	13.4273	13.3094	13.0888
600	13.0785	12.9625	12.7456	13.0819	12.9659	12.749	12.4117	12.2957	12.0789	-	-	-	-	-	-	15.7445	15.6285	15.4116	14.1961	14.0801	13.8633	13.2567	13.1407	12.9238	9.56002	9.44403	9.22716	11.6699	11.554	11.3371	13.3569	13.2409	13.024
620	12.4761	12.3741	12.183	12.4521	12.3501	12.159	11.7952	11.6932	11.5021	-	-	-	-	-	-	15.04	14.938	14.7469	13.6438	13.5418	13.3508	12.6079	12.5059	12.3148	9.03704	8.93504	8.74396	11.0847	10.9827	10.7916	12.8658	12.7638	12.5727
640	-	-	-	12.0391	11.9461	11.7716	11.3951	11.3021	11.1276	-	-	-	-	-	-	14.5562	14.4633	14.2888	13.3006	13.2076	13.0332	12.2014	12.1084	11.9339	8.72503	8.63205	8.45758	10.7131	10.6201	10.4456	12.4415	12.3485	12.174
660	-	-	-	11.552	11.1957	10.6011	10.9204	10.5641	9.96956	-	-	-	-	-	-	14.002	13.6457	13.0511	12.8762	12.52	11.9254	11.7294	11.3732	10.7786	8.33344	7.9772	7.38261	10.2643	9.90809	9.3135	12.0071	11.7301	11.2574
680	-	-	-	11.5502	11.194	10.5994	10.9305	10.5743	9.9797	-	-	-	-	-	-	13.9364	13.5802	12.9856	12.9309	12.5746	11.9801	11.7399	11.3837	10.7891	8.42218	8.06596	7.47141	10.2982	9.94203	9.34748	11.8662	11.51	10.9155
700	-	-	-	11.5491	11.1929	10.5984	10.9406	10.5844	9.98993	-	-	-	-	-	-	13.8746	13.5184	12.9239	12.9804	12.6243	12.0298	11.7487	11.3925	10.798	8.50692	8.15074	7.55623	10.3304	9.97421	9.37971	11.8748	11.5186	10.9241
a 150 m thick serpentine layer, High Interaction case
b 300 m thick serpentine layer, High Interaction case
c 600 m thick serpentine layer, High Interaction case
[truncated: 2 more columns]

## Sheet: bas(h)-sed(c) (1)
Metabasalt(h), no input of serpentinite-derived fluid
	omphacite		chlorite		phengite		tremolite		glaucophane		lawsonite		titanite		water		rutile		garnet		quartz		talc		zoisite		kyanite		bulk δ18O
T (°C)	vol.%	δ18O	vol.%	δ18O	vol.%	δ18O	vol.%	δ18O	vol.%	δ18O	vol.%	δ18O	vol.%	δ18O	vol.%	δ18O	vol.%	δ18O	vol.%	δ18O	vol.%	δ18O	vol.%	δ18O	vol.%	δ18O	vol.%	δ18O
350	8.9919	6.61074	6.37908	5.01288	1.44846	7.03699	28.987	5.54584	21.5029	5.96549	28.7261	5.58768	3.62302	4.54496	0.34145	5.96838	-	-	-	-	-	-	-	-	-	-	-	-	5.7
375	9.04111	6.54454	6.3891	5.01321	1.45231	6.94227	29.1993	5.54477	21.4399	5.92942	28.8416	5.63299	3.63599	4.59417	0.000637441	6.25566	-	-	-	-	-	-	-	-	-	-	-	-	5.69937
400	9.06107	6.48335	6.37022	5.01563	1.45128	6.8579	29.3368	5.54525	21.2751	5.89717	28.8689	5.67225	3.63663	4.63965	-	-	-	-	-	-	-	-	-	-	-	-	-	-	5.69937
420	9.22475	6.43505	6.38949	5.01632	1.45213	6.79447	29.3566	5.54632	21.1203	5.87429	28.7969	5.69748	3.63655	4.67117	0.0232943	6.66808	-	-	-	-	-	-	-	-	-	-	-	-	5.69937
440	9.47547	6.38831	6.42499	5.01687	1.45332	6.73507	29.3298	5.54802	20.9525	5.85337	28.6923	5.71881	3.63722	4.69971	0.0344781	6.81467	-	-	-	-	-	-	-	-	-	-	-	-	5.69921
460	9.75388	6.34408	6.4556	5.01814	1.45474	6.68022	29.3069	5.55038	20.7613	5.83386	28.5919	5.73762	3.63833	4.72648	0.0373723	6.9438	-	-	-	-	-	-	-	-	-	-	-	-	5.69894
480	16.1988	6.26712	5.7123	4.99886	1.46006	6.60828	30.8746	5.53255	15.2976	5.79473	28.7813	5.73306	-	-	0.429429	7.03646	1.24598	2.29038	-	-	-	-	-	-	-	-	-	-	5.69861
500	14.059	6.32302	-	-	1.47056	6.58828	30.4618	5.56252	16.2047	5.80438	23.1476	5.77471	-	-	3.4027	7.16378	1.2536	2.42521	10.0001	4.87787	-	-	-	-	-	-	-	-	5.69455
520	22.4334	6.24576	-	-	1.70141	6.45589	28.0449	5.47756	13.9857	5.70033	19.4742	5.69888	-	-	2.85565	7.16343	1.4474	2.43764	7.82409	4.81032	2.23324	9.46422	-	-	-	-	-	-	5.75646
540	29.7877	6.18611	-	-	1.9083	6.35544	27.1038	5.4205	11.2762	5.62432	16.7199	5.65051	-	-	2.02263	7.18153	1.62052	2.47302	5.45603	4.7664	4.10487	9.26961	-	-	-	-	-	-	5.81501
560	35.5288	6.14327	-	-	2.06657	6.28199	27.0673	5.38839	8.44502	5.57335	14.6959	5.62506	-	-	1.35488	7.21456	1.75171	2.52712	3.57832	4.74176	5.51151	9.10745	-	-	-	-	-	-	5.86135
580	40.0659	6.1098	-	-	2.17839	6.22347	27.4395	5.36936	5.26226	5.53508	12.9199	5.61084	-	-	1.02781	7.25171	1.84287	2.58858	2.6494	4.72378	6.61399	8.96521	-	-	-	-	-	-	5.89374
600	59.7991	5.87166	-	-	2.26441	5.98994	-	-	-	-	9.43564	5.41874	-	-	1.43421	7.10467	1.92294	2.46856	2.83083	4.53298	7.29406	8.65303	15.0188	5.86266	-	-	-	-	5.9187
620	62.5267	5.87324	-	-	2.36448	5.97815	-	-	-	-	8.44367	5.44504	-	-	0.540733	7.17038	2.00757	2.56357	1.32508	4.55215	8.08006	8.56652	14.5382	5.84062	0.173457	5.48776	-	-	5.9507
640	65.2998	5.81422	-	-	2.38395	5.92228	-	-	-	-	-	-	-	-	2.59491	7.18446	2.03068	2.60887	0.635435	4.52689	8.87664	8.44008	12.783	5.77575	3.51334	5.45068	1.88227	5.8748	5.96652
660	70.9738	5.79522	-	-	2.45802	5.91381	-	-	-	-	-	-	-	-	0.498875	7.23896	2.10158	2.69617	0.337401	4.54661	9.36148	8.3647	10.6393	5.75921	-	-	3.6296	5.86407	5.95386
680	71.3632	5.80694	-	-	2.47577	5.91236	-	-	-	-	-	-	-	-	0.0484166	7.29396	2.12037	2.78528	0.633006	4.56701	9.62576	8.2995	10.3017	5.75032	-	-	3.43175	5.86043	5.95454
700	71.6178	5.81901	-	-	2.49005	5.91182	-	-	-	-	-	-	-	-	0.0690342	7.34418	2.13606	2.87066	0.818987	4.58563	9.94137	8.23834	9.76906	5.74309	-	-	3.15766	5.85792	5.96376
Metasediment(c), no input of serpentinite-derived fluid in the metabasalt
	calcite				jadeite				phengite				glaucophane				lawsonite				quartz				rutile				aragonite				water				ankerite				titanite				garnet				bulk δ18Oa
T (°C)	vol.%a	δ18Oa	δ18Ob	δ18Oc	vol.%a	δ18Oa	δ18Ob	δ18Oc	vol.%a	δ18Oa	δ18Ob	δ18Oc	vol.%a	δ18Oa	δ18Ob	δ18Oc	vol.%a	δ18Oa	δ18Ob	δ18Oc	vol.%a	δ18Oa	δ18Ob	δ18Oc	vol.%a	δ18Oa	δ18Ob	δ18Oc	vol.%a	δ18Oa	δ18Ob	δ18Oc	vol.%a	δ18Oa	δ18Ob	δ18Oc	vol.%a	δ18Oa	δ18Ob	δ18Oc	vol.%a	δ18Oa	δ18Ob	δ18Oc	vol.%a	δ18Oa	δ18Ob	δ18Oc
350	3.17689	27.7534	27.4628	27.1821	6.3711	24.4762	24.1856	23.9049	16.362	23.8404	23.5498	23.2691	12.0149	22.8172	22.5266	22.2458	5.38262	22.3911	22.1005	21.8198	14.2494	27.9599	27.6693	27.3886	0.3085	18.189	17.8985	17.6177	41.366	25.4224	25.1318	24.8511	0.768596	22.7718	22.4812	22.2005	-	-	-	-	-	-	-	-	-	-	-	-	25
375	3.52974	27.6213	27.3299	27.0484	7.05673	24.4613	24.171	23.8906	16.3126	23.8785	23.5871	23.3057	11.3703	22.9145	22.6229	22.341	5.64042	22.569	22.2776	21.9961	14.3864	27.7887	27.4973	27.2158	0.311399	18.5379	18.2465	17.965	41.3924	25.3805	25.0891	24.8076	-	-	-	-	-	-	-	-	-	-	-	-	-	-	-	-	25.0122
400	3.96939	27.4946	27.2033	26.922	7.91255	24.4333	24.1434	23.8635	16.1995	23.908	23.6167	23.3354	10.3024	22.9966	22.7051	22.4235	5.89912	22.722	22.4308	22.1495	14.4174	27.6282	27.3369	27.0556	0.31198	18.8485	18.5573	18.2759	40.9876	25.3373	25.0461	24.7648	-	-	-	-	-	-	-	-	-	-	-	-	-	-	-	-	25.0122
420	4.26639	27.4019	27.0906	26.7892	8.4823	24.4224	24.1376	23.8362	16.1945	23.9318	23.6206	23.3192	9.53949	23.0563	22.7396	22.4382	6.05385	22.8344	22.5231	22.2217	14.4363	27.5121	27.2007	26.8994	0.312243	19.0784	18.7671	18.4657	40.715	25.3076	24.9963	24.6949	-	-	23.4937	23.1923	-	-	-	-	-	-	-	-	-	-	-	-	25.0122
440	4.58178	27.314	26.9717	26.6406	9.08738	24.4123	24.0839	23.7528	16.1964	23.9533	23.6111	23.28	8.7267	23.1108	22.7657	22.4345	6.21612	22.9365	22.5943	22.2632	14.455	27.4032	27.0609	26.7298	0.312541	19.2911	18.9488	18.6177	40.4241	25.2792	24.937	24.6058	-	-	23.6901	23.359	-	-	-	-	-	-	-	-	-	-	-	-	25.0122
460	4.62774	27.2141	26.8372	26.4738	10.7463	24.3518	23.9749	23.6115	16.184	23.9563	23.5794	23.216	6.57518	23.1401	22.7632	22.3998	6.57333	23.0131	22.6362	22.2728	14.5313	27.2846	26.9077	26.5443	0.313083	19.472	19.0951	18.7317	39.6425	25.2357	24.8587	24.4953	0.02363	24.2193	23.8424	23.479	0.782901	26.7207	26.4646	26.1335	-	-	-	-	-	-	-	-	25.0121
480	5.01039	27.0445	26.2901	25.5816	16.2744	24.1355	23.3811	22.6726	16.1751	23.8836	23.1292	22.4207	-	-	-	-	6.61963	23.0079	22.2535	21.545	14.9413	27.0983	26.3439	25.6354	0.197409	19.5652	18.8108	18.1023	36.9617	25.1196	24.3652	23.6567	0.378859	24.3113	23.5569	22.8484	3.09957	26.5642	26.3437	25.9803	0.341573	22.0054	21.2509	20.5424	-	-	-	-	25.0123
500	4.99471	26.987	23.6918	21.3063	16.7156	24.1456	20.8504	18.4649	16.1998	23.9175	20.6222	18.2367	-	-	-	-	6.40354	23.1037	19.8085	17.423	15.0388	27.0258	23.7305	21.345	0.315237	19.7542	16.459	14.0734	37.3044	25.1128	21.8176	19.4321	0.0749631	24.4927	21.1975	18.812	2.95304	26.5193	25.8098	25.1013	-	-	-	-	-	-	-	-	25.0141
520	5.02785	26.9267	21.9783	18.7822	16.9543	24.1588	19.2103	16.0143	16.1938	23.9439	18.9954	15.7994	-	-	-	-	6.04606	23.1869	18.2385	15.0425	15.1091	26.9523	22.0038	18.8078	0.315298	19.9257	14.9772	11.7812	37.3147	25.1011	20.1526	16.9566	0.108381	24.6515	19.703	16.507	2.93053	26.4713	23.2241	20.8386	-	-	-	-	-	-	-	-	25.0144
540	5.45607	26.8769	20.951	17.3752	15.7873	24.2679	18.342	14.7662	16.1857	23.9763	18.0504	14.4746	-	-	-	-	3.01808	23.2716	17.3457	13.7699	15.7416	26.8907	20.9648	17.389	0.314898	20.0941	14.1682	10.5924	38.4719	25.0976	19.1717	15.5959	0.907482	24.8027	18.8767	15.301	1.34009	26.4334	21.5229	18.3268	-	-	-	-	22.4199	17.4199	16.494	12.9182	25.0146
560	6.00601	26.8313	20.3019	16.5293	15.5236	24.3554	17.8259	14.0533	16.791	24.0088	17.4794	13.7068	-	-	-	-	0.428369	23.3523	16.8228	13.0502	16.8832	26.8346	20.3052	16.5326	0.326172	20.2543	13.7249	9.95228	40.9132	25.0962	18.5668	14.7942	0.808426	24.9418	18.4123	14.6397	0.0234092	26.3993	20.5075	16.9317	-	-	-	-	22.5153	17.5153	15.9858	12.2132	25.0997
580	6.13109	26.7879	19.8223	15.9267	16.034	24.3837	17.4182	13.5226	17.289	24.0395	17.074	13.1784	-	-	-	-	-	-	-	-	17.5045	26.7819	19.8164	15.9208	0.336514	20.4053	13.4397	9.54414	42.3168	25.095	18.1295	14.2339	0.135492	25.0684	18.1029	14.2073	-	-	-	16.0972	-	-	-	-	22.6052	17.6053	15.6397	11.7441	25.1694
600	6.18187	26.7473	19.2121	15.1822	16.1213	24.4109	16.8757	12.8458	17.3124	24.0695	16.5343	12.5044	-	-	-	-	-	-	-	-	17.5669	26.7331	19.1979	15.168	0.337892	20.5487	13.0134	8.98356	42.4754	25.095	17.5598	13.5299	0.00418981	25.1848	17.6495	13.6197	-	-	-	-	-	-	-	-	-	-	-	-	25.1768
620	6.20939	26.7085	18.9705	14.897	16.1438	24.4366	16.6986	12.6251	17.2736	24.0981	16.36	12.2865	-	-	-	-	-	-	-	-	17.5609	26.6871	18.9491	14.8756	0.337973	20.6841	12.9461	8.87261	42.4708	25.0951	17.3571	13.2835	0.00354505	25.2909	17.5529	13.4794	-	-	-	-	-	-	-	-	-	-	-	-	25.1767
640	6.23783	26.6713	18.0445	13.8591	16.1635	24.4608	15.834	11.6485	17.2382	24.1251	15.4983	11.3129	-	-	-	-	-	-	-	-	17.5539	26.6435	18.0167	13.8313	0.338015	20.8123	12.1855	8.00005	42.465	25.0952	16.4684	12.2829	0.00354483	25.3879	16.7611	12.5756	-	-	-	-	-	-	-	-	-	-	-	-	25.1767
660	6.26767	26.6356	17.8457	13.6423	16.1809	24.4836	15.6937	11.4903	17.206	24.1509	15.361	11.1576	-	-	-	-	-	-	-	-	17.5463	26.6022	17.8123	13.6089	0.338089	20.9337	12.1438	7.94042	42.4581	25.0954	16.3055	12.1021	0.00290012	25.4765	16.6866	12.4832	-	-	-	-	-	-	-	-	-	-	-	-	25.1767
680	6.29926	26.6012	17.7955	13.5904	16.1964	24.5052	15.6995	11.4944	17.1762	24.1755	15.3698	11.1646	-	-	-	-	-	-	-	-	17.5381	26.5631	17.7574	13.5523	0.338159	21.0489	12.2432	8.03806	42.4493	25.0956	16.2899	12.0848	0.00257768	25.5576	16.7519	12.5467	-	-	-	-	-	-	-	-	-	-	-	-	25.1767
700	6.33312	26.568	17.7401	13.5325	16.2101	24.5256	15.6977	11.4901	17.1487	24.1989	15.3709	11.1633	-	-	-	-	-	-	-	-	17.5293	26.5259	17.698	13.4904	0.338226	21.1583	12.3303	8.12273	42.4382	25.0959	16.2679	12.0603	0.00225527	25.6318	16.8038	12.5962	-	-	-	-	-	-	-	-	-	-	-	-	25.1767
a No Interaction case
b Partial Interaction case
c High Interaction case
[truncated: 2 more columns]

## Sheet: bas(h)-sed(c) (2)
Metabasalt(h), input of serpentinite-derived fluid
	omphacite			chlorite			phengite			tremolite			glaucophane			lawsonite			titanite			water			rutile			garnet			quartz			TALC			zoisite			kyanite			bulk	bulk	bulk
T (°C)	δ18Oa	δ18Ob	δ18Oc	δ18Oa	δ18Ob	δ18Oc	δ18Oa	δ18Ob	δ18Oc	δ18Oa	δ18Ob	δ18Oc	δ18Oa	δ18Ob	δ18Oc	δ18Oa	δ18Ob	δ18Oc	δ18Oa	δ18Ob	δ18Oc	δ18Oa	δ18Ob	δ18Oc	δ18Oa	δ18Ob	δ18Oc	δ18Oa	δ18Ob	δ18Oc	δ18Oa	δ18Ob	δ18Oc	δ18Oa	δ18Ob	δ18Oc	δ18Oa	δ18Ob	δ18Oc	δ18Oa	δ18Ob	δ18Oc	δ18Oa	δ18Ob	δ18Oc
350	6.61074	6.61074	6.61074	5.01288	5.01288	5.01288	7.03699	7.03699	7.03699	5.54584	5.54584	5.54584	5.96549	5.96549	5.96549	5.58768	5.58768	5.58768	4.54496	4.54496	4.54496	5.96838	5.96838	5.96838	-	-	-	-	-	-	-	-	-	-	-	-	-	-	-	-	-	-	5.7	5.7	5.7
375	6.54454	6.54454	6.54454	5.01321	5.01321	5.01321	6.94227	6.94227	6.94227	5.54477	5.54477	5.54477	5.92942	5.92942	5.92942	5.63299	5.63299	5.63299	4.59417	4.59417	4.59417	6.25566	6.25566	6.25566	-	-	-	-	-	-	-	-	-	-	-	-	-	-	-	-	-	-	5.69937	5.69937	5.69937
400	6.48335	6.48335	6.48335	5.01563	5.01563	5.01563	6.8579	6.8579	6.8579	5.54525	5.54525	5.54525	5.89717	5.89717	5.89717	5.67225	5.67225	5.67225	4.63965	4.63965	4.63965	-	-	-	-	-	-	-	-	-	-	-	-	-	-	-	-	-	-	-	-	-	5.69937	5.69937	5.69937
420	6.43505	6.43505	6.43505	5.01632	5.01632	5.01632	6.79447	6.79447	6.79447	5.54632	5.54632	5.54632	5.87429	5.87429	5.87429	5.69748	5.69748	5.69748	4.67117	4.67117	4.67117	6.66808	6.66808	6.66808	-	-	-	-	-	-	-	-	-	-	-	-	-	-	-	-	-	-	5.69937	5.69937	5.69937
440	6.38831	6.38831	6.38831	5.01687	5.01687	5.01687	6.73507	6.73507	6.73507	5.54802	5.54802	5.54802	5.85337	5.85337	5.85337	5.71881	5.71881	5.71881	4.69971	4.69971	4.69971	6.81467	6.81467	6.81467	-	-	-	-	-	-	-	-	-	-	-	-	-	-	-	-	-	-	5.69921	5.69921	5.69921
460	6.34408	6.34408	6.34408	5.01814	5.01814	5.01814	6.68022	6.68022	6.68022	5.55038	5.55038	5.55038	5.83386	5.83386	5.83386	5.73762	5.73762	5.73762	4.72648	4.72648	4.72648	6.9438	6.9438	6.9438	-	-	-	-	-	-	-	-	-	-	-	-	-	-	-	-	-	-	5.69894	5.69894	5.69894
480	6.25567	6.24433	6.22195	4.98742	4.97608	4.9537	6.59684	6.5855	6.56312	5.52111	5.50977	5.48739	5.78328	5.77194	5.74956	5.72162	5.71028	5.68789	-	-	-	7.02501	7.01367	6.99129	2.27894	2.2676	2.24522	-	-	-	-	-	-	-	-	-	-	-	-	-	-	-	5.6932	5.68784	5.67727
500	6.31158	6.30024	6.27786	-	-	-	6.57684	6.5655	6.54312	5.55108	5.53974	5.51736	5.79293	5.78159	5.75921	5.76327	5.75192	5.72955	-	-	-	7.15234	7.141	7.11862	2.41376	2.40242	2.38004	4.86643	4.85508	4.83271	-	-	-	-	-	-	-	-	-	-	-	-	5.6831	5.67176	5.64938
520	6.23432	6.22297	6.2006	-	-	-	6.44445	6.43311	6.41073	5.46612	5.45478	5.4324	5.68888	5.67754	5.65517	5.68743	5.67609	5.65371	-	-	-	7.15199	7.14065	7.11827	2.4262	2.41485	2.39248	4.79887	4.78753	4.76516	9.45278	9.44144	9.41906	-	-	-	-	-	-	-	-	-	5.74502	5.73368	5.7113
540	6.17466	6.16332	6.14095	-	-	-	6.344	6.33266	6.31028	5.40906	5.39772	5.37534	5.61287	5.60153	5.57915	5.63907	5.62773	5.60535	-	-	-	7.17009	7.15875	7.13637	2.46157	2.45023	2.42786	4.75496	4.74362	4.72124	9.25816	9.24682	9.22445	-	-	-	-	-	-	-	-	-	5.80357	5.79223	5.76985
560	6.13183	6.12049	6.09811	-	-	-	6.27055	6.25921	6.23683	5.37694	5.3656	5.34323	5.5619	5.55056	5.52819	5.61361	5.60227	5.5799	-	-	-	7.20311	7.19177	7.16939	2.51568	2.50434	2.48196	4.73032	4.71898	4.6966	9.096	9.08466	9.06228	-	-	-	-	-	-	-	-	-	5.84991	5.83857	5.81619
580	6.09836	6.08701	6.06463	-	-	-	6.21203	6.20069	6.17831	5.35792	5.34657	5.32419	5.52364	5.51229	5.48991	5.59939	5.58805	5.56567	-	-	-	7.24026	7.22892	7.20654	2.57714	2.56579	2.54341	4.71234	4.701	4.67862	8.95376	8.94242	8.92004	-	-	-	-	-	-	-	-	-	5.8823	5.87096	5.84858
600	5.86022	5.84888	5.8265	-	-	-	5.9785	5.96716	5.94478	-	-	-	-	-	-	5.4073	5.39596	5.37358	-	-	-	7.09322	7.08188	7.05951	2.45712	2.44578	2.4234	4.52154	4.5102	4.48782	8.64159	8.63025	8.60787	5.85122	5.83988	5.8175	-	-	-	-	-	-	5.90725	5.89591	5.87353
620	5.8618	5.85046	5.82808	-	-	-	5.96671	5.95537	5.93299	-	-	-	-	-	-	5.43359	5.42225	5.39987	-	-	-	7.15893	7.14759	7.12521	2.55213	2.54079	2.51841	4.5407	4.52936	4.50699	8.55507	8.54373	8.52136	5.82918	5.81783	5.79546	5.47632	5.46498	5.4426	-	-	-	5.93926	5.92792	5.90554
640	5.80277	5.79143	5.76906	-	-	-	5.91084	5.8995	5.87712	-	-	-	-	-	-	-	-	-	-	-	-	7.17302	7.16168	7.1393	2.59743	2.58609	2.56371	4.51544	4.5041	4.48173	8.42864	8.4173	8.39492	5.76431	5.75297	5.73059	5.43924	5.4279	5.40552	5.86336	5.85202	5.82964	5.95508	5.94374	5.92136
660	5.71872	5.64588	5.51019	-	-	-	5.83731	5.76447	5.62879	-	-	-	-	-	-	-	-	-	-	-	-	7.16245	7.08961	6.95393	2.61966	2.54682	2.41114	4.4701	4.39726	4.26158	8.28819	8.21535	8.07967	5.68271	5.60987	5.47419	-	-	-	5.78757	5.71473	5.57905	5.90801	5.86439	5.78326
680	5.73043	5.65759	5.52191	-	-	-	5.83585	5.76301	5.62733	-	-	-	-	-	-	-	-	-	-	-	-	7.21746	7.14462	7.00894	2.70877	2.63593	2.50025	4.49051	4.41767	4.28199	8.22299	8.15015	8.01448	5.67382	5.60097	5.4653	-	-	-	5.78392	5.71108	5.5754	5.87803	5.80519	5.66951
700	5.74251	5.66967	5.53399	-	-	-	5.83531	5.76247	5.62679	-	-	-	-	-	-	-	-	-	-	-	-	7.26767	7.19483	7.05916	2.79416	2.72131	2.58564	4.50912	4.43628	4.3006	8.16184	8.089	7.95332	5.66659	5.59374	5.45807	-	-	-	5.78142	5.70857	5.5729	5.88725	5.81441	5.67873
Metasediment(c), input of serpentinite-derived fluid in the metabasalt
	calcite			jadeite			phengite			glaucophane			lawsonite			quartz			rutile			aragonite			water			ankerite			titanite			garnet			bulk	bulk	bulk
T (°C)	δ18Oa	δ18Ob	δ18Oc	δ18Oa	δ18Ob	δ18Oc	δ18Oa	δ18Ob	δ18Oc	δ18Oa	δ18Ob	δ18Oc	δ18Oa	δ18Ob	δ18Oc	δ18Oa	δ18Ob	δ18Oc	δ18Oa	δ18Ob	δ18Oc	δ18Oa	δ18Ob	δ18Oc	δ18Oa	δ18Ob	δ18Oc	δ18Oa	δ18Ob	δ18Oc	δ18Oa	δ18Ob	δ18Oc	δ18Oa	δ18Ob	δ18Oc	δ18Oa	δ18Ob	δ18Oc
350	27.1821	27.1821	27.1821	23.9049	23.9049	23.9049	23.2691	23.2691	23.2691	22.2458	22.2458	22.2458	21.8198	21.8198	21.8198	27.3886	27.3886	27.3886	17.6177	17.6177	17.6177	24.8511	24.8511	24.8511	22.2005	22.2005	22.2005	-	-	-	-	-	-	-	-	-	24.3529	24.3529	24.3529
375	27.0484	27.0484	27.0484	23.8906	23.8906	23.8906	23.3057	23.3057	23.3057	22.341	22.341	22.341	21.9961	21.9961	21.9961	27.2158	27.2158	27.2158	17.965	17.965	17.965	24.8076	24.8076	24.8076	-	-	-	-	-	-	-	-	-	-	-	-	24.4396	24.4396	24.4396
400	26.922	26.922	26.922	23.8635	23.8635	23.8635	23.3354	23.3354	23.3354	22.4235	22.4235	22.4235	22.1495	22.1495	22.1495	27.0556	27.0556	27.0556	18.2759	18.2759	18.2759	24.7648	24.7648	24.7648	-	-	-	-	-	-	-	-	-	-	-	-	24.4396	24.4396	24.4396
420	26.7892	26.7892	26.7892	23.8362	23.8362	23.8362	23.3192	23.3192	23.3192	22.4382	22.4382	22.4382	22.2217	22.2217	22.2217	26.8994	26.8994	26.8994	18.4657	18.4657	18.4657	24.6949	24.6949	24.6949	23.1923	23.1923	23.1923	-	-	-	-	-	-	-	-	-	24.3957	24.3957	24.3957
440	26.6406	26.6406	26.6406	23.7528	23.7528	23.7528	23.28	23.28	23.28	22.4345	22.4345	22.4345	22.2632	22.2632	22.2632	26.7298	26.7298	26.7298	18.6177	18.6177	18.6177	24.6058	24.6058	24.6058	23.359	23.359	23.359	26.1335	21.3334	26.1335	-	-	-	-	-	-	24.3337	24.3337	24.3337
460	26.4738	26.4738	26.4738	23.6115	23.6115	23.6115	23.216	23.216	23.216	22.3998	22.3998	22.3998	22.2728	22.2728	22.2728	26.5443	26.5443	26.5443	18.7317	18.7317	18.7317	24.4953	24.4953	24.4953	23.479	23.479	23.479	25.9803	21.1993	25.9803	-	-	-	-	-	-	24.2684	24.2684	24.2684
480	24.6095	23.7486	22.291	21.7005	20.8396	19.3819	21.4487	20.5877	19.1301	-	-	-	20.5729	19.712	18.2543	24.6633	23.8024	22.3447	17.1303	16.2694	14.8117	22.6846	21.8237	20.366	21.8763	21.0154	19.5577	24.1293	19.2252	21.8107	19.5704	18.7095	17.2518	-	-	-	22.5055	21.6082	20.089
500	20.5896	19.9543	18.8784	17.7482	17.1129	16.037	17.52	16.8848	15.8089	-	-	-	16.7063	16.071	14.9951	20.6283	19.9931	18.9172	13.3568	12.7215	11.6456	18.7154	18.0801	17.0042	18.0953	17.4601	16.3841	20.1219	16.5184	18.4107	-	-	-	-	-	-	18.4781	17.8428	16.7669
520	18.2127	17.7078	16.8517	15.4448	14.9399	14.0838	15.2299	14.725	13.8689	-	-	-	14.4729	13.968	13.1119	18.2383	17.7334	16.8773	11.2117	10.7068	9.85069	16.3871	15.8822	15.0261	15.9375	15.4326	14.5765	17.7573	14.9035	16.3963	-	-	-	-	-	-	16.2246	15.7198	14.8636
540	16.8856	16.4514	15.7147	14.2766	13.8424	13.1057	13.985	13.5508	12.8141	-	-	-	13.2803	12.8461	12.1094	16.8994	16.4652	15.7285	10.1028	9.66862	8.93193	15.1063	14.6721	13.9354	14.8113	14.3771	13.6404	16.4421	13.9954	15.2712	-	-	-	12.4286	11.9944	11.2577	14.993	14.5587	13.8221
560	16.0862	15.6931	15.0259	13.6102	13.2172	12.55	13.2637	12.8706	12.2035	-	-	-	12.6071	12.2141	11.5469	16.0895	15.6965	15.0293	9.50921	9.11614	8.44895	14.3511	13.958	13.2908	14.1966	13.8036	13.1364	15.6541	13.4444	14.5939	-	-	-	11.7701	11.3771	10.7099	14.3392	13.9461	13.2789
580	15.5158	15.1509	14.5317	13.1116	12.7468	12.1276	12.7674	12.4026	11.7834	-	-	-	-	-	-	15.5098	15.145	14.5258	9.13317	8.76835	8.14915	13.8229	13.4581	12.8389	13.7963	13.4315	12.8123	-	-	-	-	-	-	11.3331	10.9683	10.3491	13.8898	13.5249	12.9057
600	14.8102	14.48	13.919	12.4738	12.1436	11.5826	12.1324	11.8022	11.2412	-	-	-	-	-	-	14.796	14.4658	13.9048	8.61155	8.28135	7.72034	13.1579	12.8277	12.2667	13.2477	12.9175	12.3564	-	-	-	-	-	-	-	-	-	13.2404	12.9102	12.3492
620	14.5386	14.2203	13.6796	12.2666	11.9484	11.4076	11.9281	11.6098	11.0691	-	-	-	-	-	-	14.5171	14.1989	13.6581	8.51416	8.19594	7.65518	12.9251	12.6069	12.0661	13.121	12.8027	12.262	-	-	-	-	-	-	-	-	-	13.0111	12.6928	12.1521
640	13.555	13.2848	12.8252	11.3444	11.0742	10.6146	11.0088	10.7386	10.279	-	-	-	-	-	-	13.5271	13.257	12.7974	7.69593	7.42576	6.96616	11.9788	11.7086	11.249	12.2715	12.0013	11.5417	-	-	-	-	-	-	-	-	-	12.0934	11.8232	11.3636
660	12.3981	11.5481	10.4553	10.2461	9.39619	8.30335	9.91342	9.06347	7.97062	-	-	-	-	-	-	12.3648	11.5148	10.422	6.69623	5.84629	4.75344	10.8579	10.0079	8.91508	11.239	10.3891	9.29623	-	-	-	-	-	-	-	-	-	11.0039	10.1912	9.14606
680	12.35	11.5027	10.4131	10.2541	9.40669	8.31708	9.92429	9.07693	7.98732	-	-	-	-	-	-	12.312	11.4646	10.375	6.79773	5.95037	4.86076	10.8444	9.99707	8.90746	11.3064	10.4591	9.36944	-	-	-	-	-	-	-	-	-	10.9268	10.0794	8.98982
700	12.2976	11.4539	10.3687	10.2552	9.41148	8.32634	9.92845	9.08471	7.99956	-	-	-	-	-	-	12.2555	11.4118	10.3266	6.88785	6.04411	4.95897	10.8255	9.98171	8.89657	11.3614	10.5176	9.43249	-	-	-	-	-	-	-	-	-	10.9084	10.0647	8.97952
a 150 m thick serpentine layer, High Interaction case
b 300 m thick serpentine layer, High Interaction case
c 600 m thick serpentine layer, High Interaction case

## Sheet: bas(h)-sed(t)  (1)
Metabasalt(h), no input of serpentinite-derived fluid
	omphacite		chlorite		phengite		tremolite		glaucophane		lawsonite		titanite		water		rutile		garnet		quartz		talc		zoisite		kyanite		bulk δ18O
T (°C)	vol.%	δ18O	vol.%	δ18O	vol.%	δ18O	vol.%	δ18O	vol.%	δ18O	vol.%	δ18O	vol.%	δ18O	vol.%	δ18O	vol.%	δ18O	vol.%	δ18O	vol.%	δ18O	vol.%	δ18O	vol.%	δ18O	vol.%	δ18O
350	8.9919	6.61074	6.37908	5.01288	1.44846	7.03699	28.987	5.54584	21.5029	5.96549	28.7261	5.58768	3.62302	4.54496	0.34145	5.96838	-	-	-	-	-	-	-	-	-	-	-	-	5.7
375	9.04111	6.54454	6.3891	5.01321	1.45231	6.94227	29.1993	5.54477	21.4399	5.92942	28.8416	5.63299	3.63599	4.59417	0.000637441	6.25566	-	-	-	-	-	-	-	-	-	-	-	-	5.69937
400	9.06107	6.48335	6.37022	5.01563	1.45128	6.8579	29.3368	5.54525	21.2751	5.89717	28.8689	5.67225	3.63663	4.63965	-	-	-	-	-	-	-	-	-	-	-	-	-	-	5.69937
420	9.22475	6.43505	6.38949	5.01632	1.45213	6.79447	29.3566	5.54632	21.1203	5.87429	28.7969	5.69748	3.63655	4.67117	0.0232943	6.66808	-	-	-	-	-	-	-	-	-	-	-	-	5.69937
440	9.47547	6.38831	6.42499	5.01687	1.45332	6.73507	29.3298	5.54802	20.9525	5.85337	28.6923	5.71881	3.63722	4.69971	0.0344781	6.81467	-	-	-	-	-	-	-	-	-	-	-	-	5.69921
460	9.75388	6.34408	6.4556	5.01814	1.45474	6.68022	29.3069	5.55038	20.7613	5.83386	28.5919	5.73762	3.63833	4.72648	0.0373723	6.9438	-	-	-	-	-	-	-	-	-	-	-	-	5.69894
480	16.1988	6.26712	5.7123	4.99886	1.46006	6.60828	30.8746	5.53255	15.2976	5.79473	28.7813	5.73306	-	-	0.429429	7.03646	1.24598	2.29038	-	-	-	-	-	-	-	-	-	-	5.69861
500	14.059	6.32302	-	-	1.47056	6.58828	30.4618	5.56252	16.2047	5.80438	23.1476	5.77471	-	-	3.4027	7.16378	1.2536	2.42521	10.0001	4.87787	-	-	-	-	-	-	-	-	5.69455
520	22.4334	6.24576	-	-	1.70141	6.45589	28.0449	5.47756	13.9857	5.70033	19.4742	5.69888	-	-	2.85565	7.16343	1.4474	2.43764	7.82409	4.81032	2.23324	9.46422	-	-	-	-	-	-	5.75646
540	29.7877	6.18611	-	-	1.9083	6.35544	27.1038	5.4205	11.2762	5.62432	16.7199	5.65051	-	-	2.02263	7.18153	1.62052	2.47302	5.45603	4.7664	4.10487	9.26961	-	-	-	-	-	-	5.81501
560	35.5288	6.14327	-	-	2.06657	6.28199	27.0673	5.38839	8.44502	5.57335	14.6959	5.62506	-	-	1.35488	7.21456	1.75171	2.52712	3.57832	4.74176	5.51151	9.10745	-	-	-	-	-	-	5.86135
580	40.0659	6.1098	-	-	2.17839	6.22347	27.4395	5.36936	5.26226	5.53508	12.9199	5.61084	-	-	1.02781	7.25171	1.84287	2.58858	2.6494	4.72378	6.61399	8.96521	-	-	-	-	-	-	5.89374
600	59.7991	5.87166	-	-	2.26441	5.98994	-	-	-	-	9.43564	5.41874	-	-	1.43421	7.10467	1.92294	2.46856	2.83083	4.53298	7.29406	8.65303	15.0188	5.86266	-	-	-	-	5.9187
620	62.5267	5.87324	-	-	2.36448	5.97815	-	-	-	-	8.44367	5.44504	-	-	0.540733	7.17038	2.00757	2.56357	1.32508	4.55215	8.08006	8.56652	14.5382	5.84062	0.173457	5.48776	-	-	5.9507
640	65.2998	5.81422	-	-	2.38395	5.92228	-	-	-	-	-	-	-	-	2.59491	7.18446	2.03068	2.60887	0.635435	4.52689	8.87664	8.44008	12.783	5.77575	3.51334	5.45068	1.88227	5.8748	5.96652
660	70.9738	5.79522	-	-	2.45802	5.91381	-	-	-	-	-	-	-	-	0.498875	7.23896	2.10158	2.69617	0.337401	4.54661	9.36148	8.3647	10.6393	5.75921	-	-	3.6296	5.86407	5.95386
680	71.3632	5.80694	-	-	2.47577	5.91236	-	-	-	-	-	-	-	-	0.0484166	7.29396	2.12037	2.78528	0.633006	4.56701	9.62576	8.2995	10.3017	5.75032	-	-	3.43175	5.86043	5.95454
700	71.6178	5.81901	-	-	2.49005	5.91182	-	-	-	-	-	-	-	-	0.0690342	7.34418	2.13606	2.87066	0.818987	4.58563	9.94137	8.23834	9.76906	5.74309	-	-	3.15766	5.85792	5.96376
Metasediment(t), no input of serpentinite-derived fluid in the metabasalt
	omphacite				phengite				glaucophane				lawsonite				titanite				quartz				water				jadeite				rutile				garnet				bulk δ18O	bulk δ18O	bulk δ18O
T (°C)	vol.%a	δ18Oa	δ18Ob	δ18Oc	vol.%a	δ18Oa	δ18Ob	δ18Oc	vol.%a	δ18Oa	δ18Ob	δ18Oc	vol.%a	δ18Oa	δ18Ob	δ18Oc	vol.%a	δ18Oa	δ18Ob	δ18Oc	vol.%a	δ18Oa	δ18Ob	δ18Oc	vol.%a	δ18Oa	δ18Ob	δ18Oc	vol.%a	δ18Oa	δ18Ob	δ18Oc	vol.%a	δ18Oa	δ18Ob	δ18Oc	vol.%a	δ18Oa	δ18Ob	δ18Oc	δ18Oa	δ18Ob	δ18Oc
350	11.454	14.927	14.8642	14.8023	36.6422	15.2361	15.1733	15.1114	30.1126	14.1786	14.1157	14.0539	9.3835	13.7868	13.724	13.6621	1.43852	12.7441	12.6813	12.6194	8.15158	19.3556	19.2928	19.231	2.81767	14.1675	14.1047	14.0428	-	-	-	-	-	-	-	-	-	-	-	-	15	14.9308	14.8626
375	11.735	14.9426	14.8798	14.8179	37.6574	15.2121	15.1492	15.0873	31.0101	14.2162	14.1533	14.0914	9.67063	13.9026	13.8398	13.7779	1.48094	12.8638	12.801	12.7391	8.38377	19.1224	19.0595	18.9976	-	-	-	-	0.0621096	15.6909	15.6281	15.5662	-	-	-	-	-	-	-	-	15.0169	14.9539	14.8919
400	11.6312	14.9545	14.8917	14.8298	37.6095	15.1908	15.128	15.0661	31.0353	14.2507	14.1878	14.1258	9.68617	14.0049	13.9421	13.8801	1.48165	12.9723	12.9095	12.8475	8.37702	18.9111	18.8482	18.7863	-	-	-	-	0.179265	15.6256	15.5627	15.5008	-	-	-	-	-	-	-	-	15.0169	14.9539	14.8919
420	11.5576	14.9628	14.8966	14.8301	37.6401	15.1757	15.1094	15.0429	31.0095	14.2738	14.2067	14.1402	9.68007	14.0783	14.012	13.9455	1.48184	13.052	12.9857	12.9192	8.38215	18.756	18.6897	18.6232	-	-		-	0.248757	15.574	15.508	15.4415	-	-	-	-	-	-	-	-	15.0169	14.9493	14.8829
440	12.0868	14.964	14.8896	14.8164	37.6469	15.1566	15.0822	15.009	30.9569	14.293	14.2186	14.1453	9.25102	14.1398	14.0654	13.9922	1.48097	13.1207	13.0463	12.9731	8.45079	18.6065	18.5321	18.4589	0.12663	15.2357	15.1613	15.0881	-	-	-	-	-	-	-	-	-	-	-	-	15.0169	14.9427	14.8697
460	12.3704	14.9564	14.8745	14.794	37.6388	15.139	15.0572	14.9766	30.9139	14.3114	14.2295	14.149	8.83347	14.1959	14.114	14.0335	1.48018	13.1847	13.1029	13.0224	8.5125	18.4673	18.3854	18.3049	0.124256	15.402	15.3202	15.2397	-	-	-	-	-	-	-	-	-	-	-	-	15.0167	14.9352	14.855
480	15.5383	14.9137	14.7469	14.5848	37.6425	15.1079	14.9411	14.779	28.599	14.3135	14.1467	13.9846	8.53728	14.2322	14.0654	13.9033	-	-	-	-	8.69535	18.3225	18.1558	17.9936	0.231573	15.5356	15.3688	15.2067	-	-	-	-	0.50581	10.7895	10.6227	10.4606	-	-	-	-	15.0163	14.8548	14.6978
500	15.8774	14.9079	14.1189	13.4435	37.6424	15.0925	14.3036	13.6282	28.5337	14.3291	13.5401	12.8647	8.04389	14.2785	13.4895	12.8141	-	-	-	-	8.76956	18.2006	17.4116	16.7362	0.146418	15.6676	14.8786	14.2032	-	-	-	-	0.505659	10.929	10.14	9.4646	-	-	-	-	15.0154	14.2751	13.6416
520	17.3768	14.8633	13.6457	12.6579	37.7822	14.9664	13.7489	12.7611	18.1286	14.2325	13.015	12.0272	0.170941	14.2087	12.9912	12.0033	-	-	-	-	11.0182	17.974	16.7565	15.7687	2.95385	15.6732	14.4557	13.4679	4.48209	15.209	13.9915	13.0037	0.504361	10.9474	9.72992	8.74209	7.01809	13.3322	12.1146	11.1268	15.0147	13.8338	12.8787
540	15.3805	14.8811	13.3702	12.1869	37.7356	14.9591	13.4483	12.265	16.4985	14.2431	12.7322	11.5489	-	-	-	-	-	-	-	-	11.2129	17.8727	16.3618	15.1785	0.177687	15.7847	14.2738	13.0905	6.94259	15.1847	13.6738	12.4905	0.505413	11.0761	9.56525	8.38194	1.14991	13.3879	11.8771	10.6937	15.1462	13.6607	12.5008
560	13.1462	14.9011	13.2085	11.911	37.6981	14.9547	13.262	11.9645	15.034	14.255	12.5624	11.2649	-	-	-	-	-	-	-	-	11.3553	17.7797	16.0871	14.7896	0.110014	15.8868	14.1942	12.8967	9.60361	15.163	13.4704	12.1729	0.506467	11.1994	9.50674	8.20925	0.945483	13.4412	11.7486	10.4511	15.1684	13.494	12.2139
580	10.5773	14.9213	13.0973	11.7209	37.67	14.9501	13.1262	11.7497	13.5607	14.2657	12.4417	11.0653	-	-	-	-	-	-	-	-	11.4908	17.6916	15.8677	14.4913	0.10995	15.9781	14.1542	12.7778	12.6724	15.1419	13.3179	11.9415	0.507483	11.315	9.49105	8.11463	0.880534	13.4896	11.6656	10.2892	15.1865	13.3773	12.0151
600	7.32463	14.9426	12.9396	11.4603	37.6493	14.9459	12.943	11.4637	12.1333	14.2758	12.2728	10.7935	-	-	-	-	-	-	-	-	11.6145	17.6085	15.6056	14.1263	0.106524	16.0602	14.0572	12.5779	16.4612	15.1207	13.1178	11.6385	0.50845	11.4241	9.4211	7.94184	0.80386	13.534	11.531	10.0518	15.2029	13.2214	11.7626
620	2.2964	14.9665	12.8987	11.3831	37.6335	14.9424	12.8746	11.359	10.7828	14.2856	12.2178	10.7022	-	-	-	-	-	-	-	-	11.7257	17.5303	15.4625	13.9469	0.100711	16.1342	14.0664	12.5508	22.0349	15.0982	13.0304	11.5148	0.50936	11.5274	9.4596	7.944	0.726362	13.5751	11.5073	9.99168	15.2176	13.1583	11.6511
640	-	-	-	-	37.6247	14.9395	12.572	10.9068	9.52017	14.2956	11.928	10.2628	-	-	-	-	-	-	-	-	11.8243	17.4567	15.0892	13.424	0.0939291	16.2011	13.8335	12.1684	24.8684	15.1018	12.7343	11.0691	0.510241	11.6255	9.25796	7.59276	0.653066	13.6135	11.246	9.5808	15.2305	12.9049	11.2781
660	-	-	-	-	37.621	14.9374	12.5141	10.8218	8.34859	14.3059	11.8825	10.1902	-	-	-	-	-	-	-	-	11.9109	17.3874	14.9641	13.2718	0.0869258	16.2617	13.8384	12.146	25.3892	15.1149	12.6916	10.9992	0.511037	11.7189	9.2956	7.60323	0.58535	13.6498	11.2265	9.53412	15.2419	12.8272	11.1432
680	-	-	-	-	37.6191	14.936	12.5073	10.8123	7.25834	14.3163	11.8876	10.1926	-	-	-	-	-	-	-	-	11.988	17.3222	14.8935	13.1985	0.0808513	16.3167	13.888	12.1929	25.8917	15.1257	12.697	11.002	0.511783	11.808	9.37929	7.68426	0.530046	13.6841	11.2554	9.56033	15.252	12.8241	11.13
700	-	-	-	-	37.6182	14.9353	12.4989	10.8001	6.24228	14.3268	11.8904	10.1917	-	-	-	-	-	-	-	-	12.0553	17.2608	14.8244	13.1257	0.0757581	16.3667	13.9302	12.2315	26.3741	15.1349	12.6985	10.9998	0.512486	11.8931	9.45673	7.75799	0.484473	13.7166	11.2802	9.58146	15.2608	12.8257	11.1283
a No Interaction case
b Partial Interaction case
c High Interaction case

## Sheet: bas(h)-sed(t)  (2)
Metabasalt(h), input of serpentinite-derived fluid
	omphacite			chlorite			phengite			tremolite			glaucophane			lawsonite			titanite			water			rutile			garnet			quartz			TALC			zoisite			kyanite			bulk	bulk	bulk
T (°C)	δ18Oa	δ18Ob	δ18Oc	δ18Oa	δ18Ob	δ18Oc	δ18Oa	δ18Ob	δ18Oc	δ18Oa	δ18Ob	δ18Oc	δ18Oa	δ18Ob	δ18Oc	δ18Oa	δ18Ob	δ18Oc	δ18Oa	δ18Ob	δ18Oc	δ18Oa	δ18Ob	δ18Oc	δ18Oa	δ18Ob	δ18Oc	δ18Oa	δ18Ob	δ18Oc	δ18Oa	δ18Ob	δ18Oc	δ18Oa	δ18Ob	δ18Oc	δ18Oa	δ18Ob	δ18Oc	δ18Oa	δ18Ob	δ18Oc	δ18Oa	δ18Ob	δ18Oc
350	6.61074	6.61074	6.61074	5.01288	5.01288	5.01288	7.03699	7.03699	7.03699	5.54584	5.54584	5.54584	5.96549	5.96549	5.96549	5.58768	5.58768	5.58768	4.54496	4.54496	4.54496	5.96838	5.96838	5.96838	-	-	-	-	-	-	-	-	-	-	-	-	-	-	-	-	-	-	5.7	5.7	5.7
375	6.54454	6.54454	6.54454	5.01321	5.01321	5.01321	6.94227	6.94227	6.94227	5.54477	5.54477	5.54477	5.92942	5.92942	5.92942	5.63299	5.63299	5.63299	4.59417	4.59417	4.59417	6.25566	6.25566	6.25566	-	-	-	-	-	-	-	-	-	-	-	-	-	-	-	-	-	-	5.69937	5.69937	5.69937
400	6.48335	6.48335	6.48335	5.01563	5.01563	5.01563	6.8579	6.8579	6.8579	5.54525	5.54525	5.54525	5.89717	5.89717	5.89717	5.67225	5.67225	5.67225	4.63965	4.63965	4.63965	-	-	-	-	-	-	-	-	-	-	-	-	-	-	-	-	-	-	-	-	-	5.69937	5.69937	5.69937
420	6.43505	6.43505	6.43505	5.01632	5.01632	5.01632	6.79447	6.79447	6.79447	5.54632	5.54632	5.54632	5.87429	5.87429	5.87429	5.69748	5.69748	5.69748	4.67117	4.67117	4.67117	6.66808	6.66808	6.66808	-	-	-	-	-	-	-	-	-	-	-	-	-	-	-	-	-	-	5.69937	5.69937	5.69937
440	6.38831	6.38831	6.38831	5.01687	5.01687	5.01687	6.73507	6.73507	6.73507	5.54802	5.54802	5.54802	5.85337	5.85337	5.85337	5.71881	5.71881	5.71881	4.69971	4.69971	4.69971	6.81467	6.81467	6.81467	-	-	-	-	-	-	-	-	-	-	-	-	-	-	-	-	-	-	5.69921	5.69921	5.69921
460	6.34408	6.34408	6.34408	5.01814	5.01814	5.01814	6.68022	6.68022	6.68022	5.55038	5.55038	5.55038	5.83386	5.83386	5.83386	5.73762	5.73762	5.73762	4.72648	4.72648	4.72648	6.9438	6.9438	6.9438	-	-	-	-	-	-	-	-	-	-	-	-	-	-	-	-	-	-	5.69894	5.69894	5.69894
480	6.25567	6.24433	6.22195	4.98742	4.97608	4.9537	6.59684	6.5855	6.56312	5.52111	5.50977	5.48739	5.78328	5.77194	5.74956	5.72162	5.71028	5.68789	-	-	-	7.02501	7.01367	6.99129	2.27894	2.2676	2.24522	-	-	-	-	-	-	-	-	-	-	-	-	-	-	-	5.6932	5.68784	5.67727
500	6.31158	6.30024	6.27786	-	-	-	6.57684	6.5655	6.54312	5.55108	5.53974	5.51736	5.79293	5.78159	5.75921	5.76327	5.75192	5.72955	-	-	-	7.15234	7.141	7.11862	2.41376	2.40242	2.38004	4.86643	4.85508	4.83271	-	-	-	-	-	-	-	-	-	-	-	-	5.6831	5.67176	5.64938
520	6.23432	6.22297	6.2006	-	-	-	6.44445	6.43311	6.41073	5.46612	5.45478	5.4324	5.68888	5.67754	5.65517	5.68743	5.67609	5.65371	-	-	-	7.15199	7.14065	7.11827	2.4262	2.41485	2.39248	4.79887	4.78753	4.76516	9.45278	9.44144	9.41906	-	-	-	-	-	-	-	-	-	5.74502	5.73368	5.7113
540	6.17466	6.16332	6.14095	-	-	-	6.344	6.33266	6.31028	5.40906	5.39772	5.37534	5.61287	5.60153	5.57915	5.63907	5.62773	5.60535	-	-	-	7.17009	7.15875	7.13637	2.46157	2.45023	2.42786	4.75496	4.74362	4.72124	9.25816	9.24682	9.22445	-	-	-	-	-	-	-	-	-	5.80357	5.79223	5.76985
560	6.13183	6.12049	6.09811	-	-	-	6.27055	6.25921	6.23683	5.37694	5.3656	5.34323	5.5619	5.55056	5.52819	5.61361	5.60227	5.5799	-	-	-	7.20311	7.19177	7.16939	2.51568	2.50434	2.48196	4.73032	4.71898	4.6966	9.096	9.08466	9.06228	-	-	-	-	-	-	-	-	-	5.84991	5.83857	5.81619
580	6.09836	6.08701	6.06463	-	-	-	6.21203	6.20069	6.17831	5.35792	5.34657	5.32419	5.52364	5.51229	5.48991	5.59939	5.58805	5.56567	-	-	-	7.24026	7.22892	7.20654	2.57714	2.56579	2.54341	4.71234	4.701	4.67862	8.95376	8.94242	8.92004	-	-	-	-	-	-	-	-	-	5.8823	5.87096	5.84858
600	5.86022	5.84888	5.8265	-	-	-	5.9785	5.96716	5.94478	-	-	-	-	-	-	5.4073	5.39596	5.37358	-	-	-	7.09322	7.08188	7.05951	2.45712	2.44578	2.4234	4.52154	4.5102	4.48782	8.64159	8.63025	8.60787	5.85122	5.83988	5.8175	-	-	-	-	-	-	5.90725	5.89591	5.87353
620	5.8618	5.85046	5.82808	-	-	-	5.96671	5.95537	5.93299	-	-	-	-	-	-	5.43359	5.42225	5.39987	-	-	-	7.15893	7.14759	7.12521	2.55213	2.54079	2.51841	4.5407	4.52936	4.50699	8.55507	8.54373	8.52136	5.82918	5.81783	5.79546	5.47632	5.46498	5.4426	-	-	-	5.93926	5.92792	5.90554
640	5.80277	5.79143	5.76906	-	-	-	5.91084	5.8995	5.87712	-	-	-	-	-	-	-	-	-	-	-	-	7.17302	7.16168	7.1393	2.59743	2.58609	2.56371	4.51544	4.5041	4.48173	8.42864	8.4173	8.39492	5.76431	5.75297	5.73059	5.43924	5.4279	5.40552	5.86336	5.85202	5.82964	5.95508	5.94374	5.92136
660	5.71872	5.64588	5.51019	-	-	-	5.83731	5.76447	5.62879	-	-	-	-	-	-	-	-	-	-	-	-	7.16245	7.08961	6.95393	2.61966	2.54682	2.41114	4.4701	4.39726	4.26158	8.28819	8.21535	8.07967	5.68271	5.60987	5.47419	-	-	-	5.78757	5.71473	5.57905	5.90801	5.86439	5.78326
680	5.73043	5.65759	5.52191	-	-	-	5.83585	5.76301	5.62733	-	-	-	-	-	-	-	-	-	-	-	-	7.21746	7.14462	7.00894	2.70877	2.63593	2.50025	4.49051	4.41767	4.28199	8.22299	8.15015	8.01448	5.67382	5.60097	5.4653	-	-	-	5.78392	5.71108	5.5754	5.87803	5.80519	5.66951
700	5.74251	5.66967	5.53399	-	-	-	5.83531	5.76247	5.62679	-	-	-	-	-	-	-	-	-	-	-	-	7.26767	7.19483	7.05916	2.79416	2.72131	2.58564	4.50912	4.43628	4.3006	8.16184	8.089	7.95332	5.66659	5.59374	5.45807	-	-	-	5.78142	5.70857	5.5729	5.88725	5.81441	5.67873
Metasediment(t), input of serpentinite-derived fluid in the metabasalt
	omphacite			phengite			glaucophane			lawsonite			titanite			quartz			water			jadeite			rutile			garnet			bulk δ18O	bulk δ18O	bulk δ18O
T (°C)	δ18Oa	δ18Ob	δ18Oc	δ18Oa	δ18Ob	δ18Oc	δ18Oa	δ18Ob	δ18Oc	δ18Oa	δ18Ob	δ18Oc	δ18Oa	δ18Ob	δ18Oc	δ18Oa	δ18Ob	δ18Oc	δ18Oa	δ18Ob	δ18Oc	δ18Oa	δ18Ob	δ18Oc	δ18Oa	δ18Ob	δ18Oc	δ18Oa	δ18Ob	δ18Oc	δ18Oa	δ18Ob	δ18Oc
350	14.8023	14.8023	14.8023	15.1114	15.1114	15.1114	14.0539	14.0539	14.0539	13.6621	13.6621	13.6621	12.6194	12.6194	12.6194	19.231	19.231	19.231	14.0428	14.0428	14.0428	-	-	-	-	-	-	-	-	-	14.8626	14.8626	14.8626
375	14.8179	14.8179	14.8179	15.0873	15.0873	15.0873	14.0914	14.0914	14.0914	13.7779	13.7779	13.7779	12.7391	12.7391	12.7391	18.9976	18.9976	18.9976	-	-	-	15.5662	15.5662	15.5662	-	-	-	-	-	-	14.8919	14.8919	14.8919
400	14.8298	14.8298	14.8298	15.0661	15.0661	15.0661	14.1258	14.1258	14.1258	13.8801	13.8801	13.8801	12.8475	12.8475	12.8475	18.7863	18.7863	18.7863	-	-	-	15.5008	15.5008	15.5008	-	-	-	-	-	-	14.8919	14.8919	14.8919
420	14.8301	14.8301	14.8301	15.0429	15.0429	15.0429	14.1402	14.1402	14.1402	13.9455	13.9455	13.9455	12.9192	12.9192	12.9192	18.6232	18.6232	18.6232	14.9161	14.9161	14.9161	15.4415	15.4415	15.4415	-	-	-	-	-	-	14.8829	14.8829	14.8829
440	14.8164	14.8164	14.8164	15.009	15.009	15.009	14.1453	14.1453	14.1453	13.9922	13.9922	13.9922	12.9731	12.9731	12.9731	18.4589	18.4589	18.4589	15.0881	15.0881	15.0881	-	-	-	-	-	-	-	-	-	14.8697	14.8697	14.8697
460	14.794	14.794	14.794	14.9766	14.9766	14.9766	14.149	14.149	14.149	14.0335	14.0335	14.0335	13.0224	13.0224	13.0224	18.3049	18.3049	18.3049	15.2397	15.2397	15.2397	-	-	-	-	-	-	-	-	-	14.855	14.855	14.855
480	14.3471	14.1221	13.7064	14.5413	14.3163	13.9006	13.7468	13.5219	13.1061	13.6655	13.4406	13.0248	-	-	-	17.7559	17.5309	17.1152	14.9689	14.744	14.3282	-	-	-	10.2229	9.9979	9.58217	-	-	-	14.4748	14.2638	13.8737
500	13.2372	13.0418	12.6808	13.4219	13.2265	12.8655	12.6584	12.463	12.102	12.6078	12.4124	12.0514	-	-	-	16.5299	16.3345	15.9735	13.9969	13.8015	13.4405	-	-	-	9.2583	9.06294	8.70191	-	-	-	13.4353	13.24	12.8789
520	12.4721	12.2962	11.9707	12.5753	12.3993	12.0739	11.8414	11.6654	11.34	11.8175	11.6416	11.3162	-	-	-	15.5829	15.4069	15.0815	13.2821	13.1061	12.7807	12.8178	12.6419	12.3165	8.55628	8.38034	8.05492	10.941	10.7651	10.4397	12.6928	12.5169	12.1915
540	12.0144	11.8511	11.5488	12.0925	11.9291	11.6268	11.3765	11.2131	10.9108	-	-	-	-	-	-	15.006	14.8427	14.5404	12.918	12.7546	12.4523	12.318	12.1546	11.8524	8.20945	8.04609	7.74383	10.5213	10.3579	10.0556	12.3283	12.1649	11.8627
560	11.7465	11.5907	11.3023	11.8	11.6442	11.3558	11.1004	10.9445	10.6561	-	-	-	-	-	-	14.6251	14.4692	14.1808	12.7322	12.5763	12.2879	12.0084	11.8525	11.5641	8.04473	7.8889	7.60049	10.2866	10.1307	9.84232	12.0493	11.8935	11.6051
580	11.562	11.4114	11.1328	11.5908	11.4402	11.1616	10.9064	10.7558	10.4772	-	-	-	-	-	-	14.3323	14.1817	13.9031	12.6189	12.4682	12.1896	11.7826	11.632	11.3533	7.95572	7.80511	7.52646	10.1303	9.9797	9.70105	11.8562	11.7056	11.427
600	11.3086	11.1649	10.8988	11.312	11.1683	10.9022	10.6418	10.4981	10.232	-	-	-	-	-	-	13.9746	13.8309	13.5648	12.4263	12.2825	12.0164	11.4868	11.3431	11.077	7.79015	7.64643	7.38033	9.90008	9.75635	9.49025	11.611	11.4672	11.2011
620	11.234	11.0927	10.8311	11.2099	11.0686	10.807	10.5531	10.4118	10.1502	-	-	-	-	-	-	13.7978	13.6566	13.395	12.4017	12.2604	11.9988	11.3657	11.2244	10.9628	7.7949	7.65362	7.39202	9.84259	9.70131	9.43971	11.502	11.3607	11.0991
640	-	-	-	10.7691	10.6386	10.3967	10.1251	9.99459	9.75277	-	-	-	-	-	-	13.2863	13.1557	12.9139	12.0306	11.9001	11.6583	10.9314	10.8009	10.5591	7.45505	7.32452	7.0827	9.44309	9.31256	9.07074	11.1404	11.0098	10.768
660	-	-	-	10.6861	10.5576	10.3194	10.0546	9.92601	9.68783	-	-	-	-	-	-	13.1361	13.0076	12.7694	12.0104	11.8819	11.6437	10.8636	10.735	10.4969	7.46761	7.33906	7.10089	9.3985	9.26995	9.03178	11.0076	10.879	10.6409
680	-	-	-	10.6769	10.5485	10.3107	10.0572	9.92878	9.69096	-	-	-	-	-	-	13.0631	12.9347	12.6969	12.0576	11.9292	11.6914	10.8666	10.7382	10.5004	7.54887	7.42049	7.18267	9.42493	9.29656	9.05874	10.9945	10.8662	10.6284
700	-	-	-	10.1505	9.61683	8.78731	9.54205	9.00839	8.17888	-	-	-	-	-	-	12.476	11.9424	11.1129	11.5819	11.0482	10.2187	10.3501	9.81648	8.98696	7.10835	6.57469	5.74518	8.93183	8.39817	7.56865	10.5961	10.1573	9.47151
a 150 m thick serpentine layer, High Interaction case
b 300 m thick serpentine layer, High Interaction case
c 600 m thick serpentine layer, High Interaction case

## Sheet: bas(a)-sed(c)  (1)
Metabasalt(a), no input of serpentinite-derived fluid
	calcite		phengite		tremolite		glaucophane		lawsonite		titanite		quartz		aragonite		water		omphacite		rutile		garnet		talc		zoisite		kyanite		diopside		bulk δ18O
T (°C)	vol.%	δ18O	vol.%	δ18O	vol.%	δ18O	vol.%	δ18O	vol.%	δ18O	vol.%	δ18O	vol.%	δ18O	vol.%	δ18O	vol.%	δ18O	vol.%	δ18O	vol.%	δ18O	vol.%	δ18O	vol.%	δ18O	vol.%	δ18O	vol.%	δ18O	vol.%	δ18O
350	3.67803	13.858	5.22094	9.94503	24.834	8.45948	22.1513	8.88131	36.5061	8.49572	2.34302	7.45299	1.73795	14.0646	3.21939	11.5271	0.30924	8.87496	-	-	-	-	-	-	-	-	-	-	-	-	-	-	9
375	6.75912	13.4595	5.23983	9.7156	23.1441	8.32346	15.8385	8.71033	36.3668	8.40627	2.35506	7.36746	2.2861	13.626	-	-	0.593724	9.03328	7.41681	9.32614	-	-	-	-	-	-	-	-	-	-	-	-	9.00026
400	6.79919	13.2408	5.26733	9.65063	23.3788	8.34299	15.7537	8.69702	36.6086	8.46488	2.36952	7.43229	2.3041	13.371	-	-	0	0	7.51876	9.28547	-	-	-	-	-	-	-	-	-	-	-	-	9.00014
420	6.79816	13.0775	5.26959	9.60216	23.4843	8.35869	15.5688	8.68865	36.5027	8.50507	2.36924	7.47875	2.30901	13.1827	-	-	0.0355416	9.47966	7.66266	9.25338	-	-	-	-	-	-	-	-	-	-	-	-	9.00014
440	6.79943	12.925	5.27373	9.55747	23.5992	8.37441	15.3641	8.68149	36.3871	8.5411	2.36972	7.522	2.31393	13.0078	-	-	0.0434251	9.6408	7.84937	9.22275	-	-	-	-	-	-	-	-	-	-	-	-	9.00003
460	6.80137	12.7826	5.27851	9.51641	23.7248	8.38992	15.1227	8.67489	36.2733	8.57371	2.37044	7.56257	2.32078	12.8451	-	-	0.0453383	9.7836	8.06281	9.1939	-	-	-	-	-	-	-	-	-	-	-	-	8.99983
480	6.81424	12.6228	5.29135	9.45238	24.2049	8.37931	10.8024	8.64276	36.0628	8.57705	-	-	2.58411	12.6674	-	-	0.313312	9.88245	13.1161	9.13007	0.810857	5.13437	-	-	-	-	-	-	-	-	-	-	8.99959
500	6.83256	12.4595	5.31114	9.37892	21.205	8.35508	8.63857	8.59749	32.7565	8.56531	-	-	3.62991	12.4874	-	-	1.326	9.95634	15.8647	9.1029	0.813415	5.2158	3.62219	7.66935	-	-	-	-	-	-	-	-	8.99765
520	7.18347	12.2725	5.59646	9.27698	17.3762	8.29865	4.64499	8.52142	28.6217	8.51997	-	-	5.63343	12.2853	-	-	2.28707	9.98645	21.6058	9.06685	0.855498	5.25873	6.1954	7.63141	-	-	-	-	-	-	-	-	9.04297
540	7.8458	12.1283	6.12531	9.21366	16.9875	8.27872	1.78613	8.48254	28.0436	8.50873	-	-	7.15876	12.1278	-	-	1.27033	10.0417	26.5296	9.04433	0.9347	5.33124	3.31823	7.62462	-	-	-	-	-	-	-	-	9.12977
560	8.22017	12.0089	6.425	9.17106	16.3083	8.27327	-	-	27.3373	8.5142	-	-	8.13124	11.9966	-	-	0.807366	10.1056	29.7445	9.02739	0.979579	5.41627	2.04644	7.63213	-	-	-	-	-	-	-	-	9.17792
580	8.4592	11.9068	6.60764	9.14195	14.4948	8.27322	-	-	26.7095	8.52964	-	-	8.7955	11.884	-	-	0.558478	10.1723	31.9704	9.01005	1.00836	5.50738	1.39608	7.64844	-	-	-	-	-	-	-	-	9.20779
600	8.62529	11.8134	6.73468	9.11786	12.7775	8.27798	-	-	26.0013	8.54673	-	-	9.34345	11.781	-	-	0.48474	10.2344	33.8052	8.99542	1.02846	5.59654	1.19934	7.66235	-	-	-	-	-	-	-	-	9.228
620	8.65305	11.5873	6.76473	8.95805	-	-	-	-	10.1162	8.42494	-	-	10.4108	11.5464	-	-	3.98963	10.1521	37.78	8.85315	1.03207	5.54348	1.48884	7.53205	7.24945	8.82052	12.5153	8.46767	-	-	-	-	9.24524
640	9.06263	11.4646	7.06388	8.89823	-	-	-	-	-	-	-	-	11.6373	11.416	-	-	3.00575	10.1621	40.8797	8.79016	1.08124	5.58482	0.404461	7.50283	6.3798	8.75169	18.7284	8.42663	1.75688	8.85075	-	-	9.24777
660	9.4109	11.3257	7.29757	8.81913	-	-	-	-	-	-	-	-	12.3183	11.2702	-	-	1.32644	10.2122	43.1431	8.66323	1.12307	5.60166	-	-	-	-	9.35116	8.36539	6.85477	8.76957	9.17465	8.57228	9.23572
680	9.53849	11.3048	7.37713	8.85558	-	-	-	-	-	-	-	-	12.4793	11.2431	-	-	3.53516e-05	10.2722	47.8855	8.69616	1.13846	5.72884	-	-	-	-	9.44984	8.41847	6.9557	8.80398	5.17203	8.61631	9.22628
700	9.54013	11.2859	7.36147	8.89172	-	-	-	-	-	-	-	-	12.4752	11.2187	-	-	3.09331e-05	10.3263	53.0971	8.73332	1.13878	5.85102	-	-	-	-	9.41892	8.47025	6.96535	8.83828	-	-	9.22626
Metasediment(c), no input of serpentinite-derived fluid in the metabasalt
	calcite				jadeite				phengite				glaucophane				lawsonite				quartz				rutile				aragonite				water				ankerite				titanite				garnet				bulk δ18Oa
T (°C)	vol.%a	δ18Oa	δ18Ob	δ18Oc	vol.%a	δ18Oa	δ18Ob	δ18Oc	vol.%a	δ18Oa	δ18Ob	δ18Oc	vol.%a	δ18Oa	δ18Ob	δ18Oc	vol.%a	δ18Oa	δ18Ob	δ18Oc	vol.%a	δ18Oa	δ18Ob	δ18Oc	vol.%a	δ18Oa	δ18Ob	δ18Oc	vol.%a	δ18Oa	δ18Ob	δ18Oc	vol.%a	δ18Oa	δ18Ob	δ18Oc	vol.%a	δ18Oa	δ18Ob	δ18Oc	vol.%a	δ18Oa	δ18Ob	δ18Oc	vol.%a	δ18Oa	δ18Ob	δ18Oc
350	3.17689	22.7534	22.6077	22.4667	6.3711	19.4762	19.3305	19.1895	16.362	18.8404	18.6947	18.5537	12.0149	17.8172	17.6715	17.5305	5.38262	17.3911	17.2454	17.1044	14.2494	22.9599	22.8142	22.6732	0.3085	13.189	13.0434	12.9024	41.366	20.4224	20.2768	20.1358	0.768596	17.7718	17.6261	17.4851	-	-	-	-	-	-	-	-	-	-	-	-	20
375	3.52974	22.6212	22.207	21.8236	7.05673	19.4613	19.0606	18.6772	16.3126	18.8785	18.4643	18.0809	11.3703	17.9145	17.4959	17.1125	5.64042	17.569	17.1547	16.7713	14.3864	22.7887	22.3744	21.991	0.311399	13.5379	13.1236	12.7402	41.3924	20.3805	19.9662	19.5828	-	-	-	-	-	-	-	-	-	-	-	-	-	-	-	-	20.0121
400	3.96939	22.4946	22.0823	21.6989	7.91255	19.4333	19.0386	18.6552	16.1995	18.908	18.4958	18.1123	10.3024	17.9966	17.5803	17.1969	5.89912	17.722	17.3097	16.9263	14.4174	22.6282	22.2159	21.8325	0.31198	13.8485	13.4362	13.0528	40.9876	20.3373	19.9251	19.5416	-	-	-	-	-	-	-	-	-	-	-	-	-	-	-	-	20.0121
420	4.26639	22.4019	21.974	21.5752	8.4823	19.4224	19.021	18.6222	16.1945	18.9318	18.504	18.1052	9.53949	18.0563	17.623	17.2242	6.05385	17.8344	17.4065	17.0077	14.4363	22.5121	22.0841	21.6853	0.312243	14.0784	13.6505	13.2517	40.715	20.3076	19.8797	19.4809	-	-	18.3771	17.9783	-	-	-	-	-	-	-	-	-	-	-	-	20.0121
440	4.58178	22.314	21.8651	21.4472	9.08738	19.4123	18.9773	18.5594	16.1964	18.9533	18.5045	18.0866	8.7267	18.1108	17.659	17.2411	6.21612	17.9365	17.4876	17.0698	14.455	22.4032	21.9543	21.5364	0.312541	14.2911	13.8422	13.4243	40.4241	20.2792	19.8303	19.4124	-	-	18.5835	18.1656	-	-	-	-	-	-	-	-	-	-	-	-	20.0121
460	4.62774	22.2141	21.7424	21.3048	10.7463	19.3518	18.8801	18.4425	16.184	18.9563	18.4846	18.047	6.57518	18.1401	17.6684	17.2308	6.57333	18.0131	17.5414	17.1038	14.5313	22.2846	21.8129	21.3753	0.313083	14.472	14.0003	13.5627	39.6425	20.2357	19.7639	19.3263	0.02363	19.2193	18.7476	18.31	0.782901	21.7207	21.2489	20.8113	-	-	-	-	-	-	-	-	20.0121
480	5.01039	22.0445	21.4162	20.8424	16.2744	19.1355	18.5072	17.9334	16.1751	18.8836	18.2553	17.6815	-	-	-	-	6.61963	18.0079	17.3796	16.8058	14.9413	22.0983	21.47	20.8962	0.197409	14.5652	13.9369	13.3631	36.9617	20.1196	19.4913	18.9175	0.378859	19.3113	18.683	18.1092	3.09957	21.5642	20.9359	20.3621	0.34	17.0054	16.377	15.8032	-	-	-	-	20.0123
500	4.99471	21.9871	20.7617	19.7379	16.7156	19.1456	17.9202	16.8965	16.1998	18.9175	17.6921	16.6683	-	-	-	-	6.40354	18.1037	16.8783	15.8546	15.0388	22.0258	20.8004	19.7766	0.315237	14.7542	13.5288	12.5051	37.3044	20.1129	18.8875	17.8637	0.0749631	19.4928	18.2674	17.2436	2.95304	21.5193	20.2939	19.2702	-	-	-	-	-	-	-	-	20.0142
520	5.02786	21.9268	19.8106	18.2617	16.9544	19.1589	17.0427	15.4937	16.1938	18.944	16.8278	15.2789	-	-	-	-	6.04608	18.187	16.0709	14.5219	15.1091	21.9524	19.8362	18.2872	0.315299	14.9258	12.8096	11.2607	37.3148	20.1012	17.985	16.4361	0.10808	19.6516	17.5354	15.9865	2.93054	21.4714	19.3552	17.8063	-	-	-	-	-	-	-	-	20.0145
540	5.45606	21.877	19.3274	17.5578	15.7872	19.268	16.7184	14.9487	16.1857	18.9764	16.4268	14.6572	-	-	-	-	3.01807	18.2717	15.7221	13.9525	15.7416	21.8908	19.3412	17.5716	0.314897	15.0942	12.5447	10.775	38.4718	20.0977	17.5481	15.7784	0.90778	19.8028	17.2532	15.4835	1.34009	21.4335	18.8839	17.1142	-	-	-	-	2.7769	17.42	14.8704	13.1007	20.0147
560	6.00601	21.8314	19.0155	17.123	15.5236	19.3555	16.5395	14.6471	16.791	19.0089	16.193	14.3006	-	-	-	-	0.428369	18.3524	15.5364	13.644	16.8832	21.8347	19.0188	17.1264	0.326172	15.2544	12.4385	10.5461	40.9132	20.0963	17.2804	15.3879	0.808426	19.9419	17.1259	15.2335	0.0234092	21.3994	18.5834	16.691	-	-	-	-	2.2965	17.5154	14.6994	12.807	20.0998
580	6.13111	21.788	18.7903	16.8199	16.0341	19.3838	16.3861	14.4157	17.289	19.0396	16.0419	14.0715	-	-	-	-	-	-	-	-	17.5045	21.782	18.7843	16.8139	0.336515	15.4054	12.4077	10.4373	42.3169	20.0952	17.0974	15.1271	0.135171	20.0685	17.0708	15.1004	-	-	-	-	-	-	-	-	0.252683	17.6053	14.6076	12.6372	20.1695
600	6.18187	21.7475	18.5964	16.5644	16.1213	19.4111	16.26	14.228	17.3124	19.0697	15.9186	13.8866	-	-	-	-	-	-	-	-	17.5669	21.7333	18.5822	16.5502	0.337892	15.5488	12.3978	10.3657	42.4754	20.0951	16.9441	14.9121	0.00418981	20.1849	17.0339	15.0018	-	-	-	-	-	-	-	-	-	-	-	-	20.1769
620	6.20935	21.7086	17.4664	15.1868	16.1437	19.4367	15.1945	12.9149	17.2735	19.0981	14.8559	12.5763	-	-	-	-	-	-	-	-	17.5608	21.6872	17.4449	15.1654	0.33797	15.6842	11.442	9.16243	42.4705	20.0952	15.8529	13.5734	0.00418958	20.291	16.0488	13.7692	-	-	-	-	-	-	-	-	-	-	-	-	20.1768
640	6.23783	21.6714	16.7245	14.3691	16.1635	19.4609	14.5139	12.1585	17.2382	19.1252	14.1783	11.8229	-	-	-	-	-	-	-	-	17.5539	21.6436	16.6967	14.3413	0.338015	15.8124	10.8655	8.51006	42.465	20.0953	15.1483	12.7929	0.00354483	20.388	15.441	13.0856	-	-	-	-	-	-	-	-	-	-	-	-	20.1768
660	6.26767	21.6357	16.3996	14.0246	16.1809	19.4837	14.2476	11.8727	17.206	19.151	13.9149	11.5399	-	-	-	-	-	-	-	-	17.5463	21.6023	16.3662	13.9913	0.338089	15.9338	10.6977	8.32276	42.4581	20.0955	14.8593	12.4844	0.00290012	20.4766	15.2405	12.8656	-	-	-	-	-	-	-	-	-	-	-	-	20.1768
680	6.29926	21.6013	16.3644	13.9895	16.1964	19.5053	14.2685	11.8935	17.1762	19.1756	13.9387	11.5637	-	-	-	-	-	-	-	-	17.5381	21.5632	16.3264	13.9514	0.338159	16.049	10.8122	8.43717	42.4493	20.0957	14.8589	12.4839	0.00257768	20.5577	15.3208	12.9459	-	-	-	-	-	-	-	-	-	-	-	-	20.1768
700	6.33312	21.5681	16.3306	13.9555	16.2101	19.5257	14.2882	11.9132	17.1487	19.199	13.9614	11.5864	-	-	-	-	-	-	-	-	17.5293	21.526	16.2885	13.9135	0.338226	16.1584	10.9208	8.54578	42.4382	20.096	14.8584	12.4834	0.00225527	20.6319	15.3943	13.0193	-	-	-	-	-	-	-	-	-	-	-	-	20.1768
a No Interaction case
b Partial Interaction case
c High Interaction case
[truncated: 2 more columns]

## Sheet: bas(a)-sed(c)  (2)
Metabasalt(a), input of serpentinite-derived fluid
	calcite			phengite			tremolite			glaucophane			lawsonite			titanite			quartz			aragonite			water			omphacite			rutile			garnet			talc			zoisite			kyanite			diopside			bulk δ18O
T (°C)	δ18Oa	δ18Ob	δ18Oc	δ18Oa	δ18Ob	δ18Oc	δ18Oa	δ18Ob	δ18Oc	δ18Oa	δ18Ob	δ18Oc	δ18Oa	δ18Ob	δ18Oc	δ18Oa	δ18Ob	δ18Oc	δ18Oa	δ18Ob	δ18Oc	δ18Oa	δ18Ob	δ18Oc	δ18Oa	δ18Ob	δ18Oc	δ18Oa	δ18Ob	δ18Oc	δ18Oa	δ18Ob	δ18Oc	δ18Oa	δ18Ob	δ18Oc	δ18Oa	δ18Ob	δ18Oc	δ18Oa	δ18Ob	δ18Oc	δ18Oa	δ18Ob	δ18Oc	δ18Oa	δ18Ob	δ18Oc	δ18Oa
350	13.8566	13.8566	13.8566	9.94357	9.94357	9.94357	8.45806	8.45806	8.45806	8.8799	8.8799	8.8799	8.49426	8.49426	8.49426	7.45154	7.45154	7.45154	14.0631	14.0631	14.0631	11.5256	11.5256	11.5256	8.87496	8.87496	8.87496	-	-	-	-	-	-	-	-	-	-	-	-	-	-	-	-	-	-	-	-	-	9
375	13.4639	13.4639	13.4639	9.71994	9.71994	9.71994	8.32778	8.32778	8.32778	8.71464	8.71464	8.71464	8.41061	8.41061	8.41061	7.3718	7.3718	7.3718	13.6303	13.6303	13.6303	-	-	-	9.03328	9.03328	9.03328	9.33106	9.33106	9.33106	-	-	-	-	-	-	-	-	-	-	-	-	-	-	-	-	-	-	9.00027
400	13.2449	13.2449	13.2449	9.65477	9.65477	9.65477	8.34712	8.34712	8.34712	8.70116	8.70116	8.70116	8.46902	8.46902	8.46902	7.43642	7.43642	7.43642	13.3752	13.3752	13.3752	-	-	-	-	-	-	9.29021	9.29021	9.29021	-	-	-	-	-	-	-	-	-	-	-	-	-	-	-	-	-	-	9.00014
420	13.0815	13.0815	13.0815	9.60615	9.60615	9.60615	8.36266	8.36266	8.36266	8.69262	8.69262	8.69262	8.50906	8.50906	8.50906	7.48274	7.48274	7.48274	13.1867	13.1867	13.1867	-	-	-	9.47966	9.47966	9.47966	9.25799	9.25799	9.25799	-	-	-	-	-	-	-	-	-	-	-	-	-	-	-	-	-	-	9.00014
440	12.9289	12.9289	12.9289	9.56132	9.56132	9.56132	8.37823	8.37823	8.37823	8.68531	8.68531	8.68531	8.54495	8.54495	8.54495	7.52584	7.52584	7.52584	13.0116	13.0116	13.0116	-	-	-	9.6408	9.6408	9.6408	9.22722	9.22722	9.22722	-	-	-	-	-	-	-	-	-	-	-	-	-	-	-	-	-	-	9.00002
460	12.7863	12.7863	12.7863	9.52012	9.52012	9.52012	8.39361	8.39361	8.39361	8.67859	8.67859	8.67859	8.57742	8.57742	8.57742	7.56628	7.56628	7.56628	12.8488	12.8488	12.8488	-	-	-	9.7836	9.7836	9.7836	9.19823	9.19823	9.19823	-	-	-	-	-	-	-	-	-	-	-	-	-	-	-	-	-	-	8.99983
480	12.6012	12.5777	12.5314	9.4307	9.40723	9.36089	8.35764	8.33416	8.28782	8.62109	8.59761	8.55127	8.55537	8.5319	8.48556	-	-	-	12.6457	12.6223	12.5759	-	-	-	9.85877	9.8353	9.78896	9.1084	9.08492	9.03858	5.1127	5.08922	5.04288	-	-	-	-	-	-	-	-	-	-	-	-	-	-	-	8.97978
500	12.4378	12.4143	12.3679	9.3572	9.33373	9.28739	8.33335	8.30988	8.26354	8.57577	8.55229	8.50595	8.54358	8.52011	8.47377	-	-	-	12.4657	12.4422	12.3958	-	-	-	9.93266	9.90918	9.86284	9.08118	9.0577	9.01136	5.19408	5.1706	5.12426	7.64762	7.62415	7.57781	-	-	-	-	-	-	-	-	-	-	-	-	8.97386
520	12.2507	12.2273	12.1809	9.25522	9.23175	9.18541	8.2769	8.25342	8.20708	8.49966	8.47618	8.42985	8.49821	8.47473	8.42839	-	-	-	12.2636	12.2401	12.1937	-	-	-	9.96276	9.93929	9.89295	9.04509	9.02162	8.97528	5.23697	5.2135	5.16716	7.60965	7.58618	7.53984	-	-	-	-	-	-	-	-	-	-	-	-	9.01905
540	12.1065	12.083	12.0367	9.19188	9.16841	9.12207	8.25694	8.23347	8.18713	8.46076	8.43728	8.39094	8.48695	8.46348	8.41714	-	-	-	12.106	12.0826	12.0362	-	-	-	10.018	9.9945	9.94816	9.02255	8.99907	8.95273	5.30946	5.28598	5.23964	7.60284	7.57937	7.53303	-	-	-	-	-	-	-	-	-	-	-	-	9.1056
560	11.9871	11.9636	11.9173	9.14925	9.12577	9.07943	8.25146	8.22799	8.18165	-	-	-	8.49239	8.46892	8.42258	-	-	-	11.9748	11.9513	11.905	-	-	-	10.0819	10.0584	10.0121	9.00558	8.98211	8.93577	5.39446	5.37098	5.32464	7.61032	7.58684	7.5405	-	-	-	-	-	-	-	-	-	-	-	-	9.15361
580	11.885	11.8615	11.8151	9.12007	9.0966	9.05026	8.25135	8.22787	8.18153	-	-	-	8.50776	8.48428	8.43794	-	-	-	11.8621	11.8387	11.7923	-	-	-	10.1486	10.1252	10.0788	8.98819	8.96472	8.91838	5.4855	5.46203	5.41569	7.62656	7.60309	7.55675	-	-	-	-	-	-	-	-	-	-	-	-	9.18338
600	11.7914	11.7679	11.7216	9.09591	9.07243	9.02609	8.25602	8.23254	8.1862	-	-	-	8.52478	8.5013	8.45496	-	-	-	11.7591	11.7356	11.6893	-	-	-	10.2107	10.1872	10.1409	8.97345	8.94998	8.90364	5.57459	5.55112	5.50478	7.64041	7.61693	7.57059	-	-	-	-	-	-	-	-	-	-	-	-	9.20353
620	11.5655	11.542	11.4956	8.93617	8.9127	8.86636	-	-	-	-	-	-	8.40306	8.37958	8.33324	-	-	-	11.5245	11.5011	11.4547	-	-	-	10.1284	10.1049	10.0586	8.83126	8.80779	8.76145	5.5216	5.49812	5.45178	7.51017	7.4867	7.44036	8.79864	8.77517	8.72883	8.44579	8.42231	8.37597	-	-	-	-	-	-	9.22071
640	11.4427	11.4192	11.3729	8.87628	8.8528	8.80646	-	-	-	-	-	-	-	-	-	-	-	-	11.3941	11.3706	11.3243	-	-	-	10.1385	10.115	10.0686	8.76821	8.74473	8.69839	5.56286	5.53939	5.49305	7.48088	7.4574	7.41107	8.72974	8.70627	8.65993	8.40467	8.3812	8.33486	8.82879	8.80532	8.75898	-	-	-	9.22314
660	11.2809	11.1307	10.8879	8.7743	8.62411	8.38134	-	-	-	-	-	-	-	-	-	-	-	-	11.2254	11.0752	10.8324	-	-	-	10.0996	9.94943	9.70665	8.6184	8.46822	8.22544	5.55683	5.40664	5.16387	-	-	-	-	-	-	8.32056	8.17038	7.9276	8.72473	8.57455	8.33177	8.45965	8.30947	8.06669	9.13734
680	11.2268	11.0766	10.8338	8.7776	8.62741	8.38463	-	-	-	-	-	-	-	-	-	-	-	-	11.1651	11.0149	10.7721	-	-	-	10.1595	10.0094	9.76657	8.61818	8.46799	8.22521	5.65085	5.50067	5.25789	-	-	-	-	-	-	8.34049	8.1903	7.94752	8.726	8.57581	8.33303	8.50368	8.3535	8.11072	9.11284
700	11.1751	11.0249	10.7821	8.78088	8.6307	8.38792	-	-	-	-	-	-	-	-	-	-	-	-	11.1079	10.9577	10.7149	-	-	-	10.2137	10.0635	9.82074	8.62247	8.47228	8.2295	5.74019	5.59	5.34722	-	-	-	-	-	-	8.35942	8.20923	7.96645	8.72745	8.57726	8.33448	-	-	-	9.11281
Metasediment(c), input of serpentinite-derived fluid in the metabasalt
	calcite			jadeite			phengite			glaucophane			lawsonite			quartz			rutile			aragonite			water			ankerite			titanite			garnet			bulk	bulk	bulk
T (°C)	δ18Oa	δ18Ob	δ18Oc	δ18Oa	δ18Ob	δ18Oc	δ18Oa	δ18Ob	δ18Oc	δ18Oa	δ18Ob	δ18Oc	δ18Oa	δ18Ob	δ18Oc	δ18Oa	δ18Ob	δ18Oc	δ18Oa	δ18Ob	δ18Oc	δ18Oa	δ18Ob	δ18Oc	δ18Oa	δ18Ob	δ18Oc	δ18Oa	δ18Ob	δ18Oc	δ18Oa	δ18Ob	δ18Oc	δ18Oa	δ18Ob	δ18Oc	δ18Oa	δ18Ob	δ18Oc
350	22.4667	22.4667	22.4667	19.1895	19.1895	19.1895	18.5537	18.5537	18.5537	17.5305	17.5305	17.5305	17.1044	17.1044	17.1044	22.6732	22.6732	22.6732	12.9024	12.9024	12.9024	20.1358	20.1358	20.1358	17.4851	17.4851	17.4851	-	-	-	-	-	-	-	-	-	19.6415	19.6415	19.6415
375	21.8236	21.8236	21.8236	18.6772	18.6772	18.6772	18.0809	18.0809	18.0809	17.1125	17.1125	17.1125	16.7713	16.7713	16.7713	21.991	21.991	21.991	12.7402	12.7402	12.7402	19.5828	19.5828	19.5828	17.3939	17.3939	17.3939	-	-	-	-	-	-	-	-	-	19.1128	19.1128	19.1128
400	21.6989	21.6989	21.6989	18.6552	18.6552	18.6552	18.1123	18.1123	18.1123	17.1969	17.1969	17.1969	16.9263	16.9263	16.9263	21.8325	21.8325	21.8325	13.0528	13.0528	13.0528	19.5416	19.5416	19.5416	-	-	-	-	-	-	-	-	-	-	-	-	19.2164	19.2164	19.2164
420	21.5752	21.5752	21.5752	18.6222	18.6222	18.6222	18.1052	18.1052	18.1052	17.2242	17.2242	17.2242	17.0077	17.0077	17.0077	21.6853	21.6853	21.6853	13.2517	13.2517	13.2517	19.4809	19.4809	19.4809	17.9783	17.9783	17.9783	-	-	-	-	-	-	-	-	-	19.1796	19.1796	19.1796
440	21.4472	21.4472	21.4472	18.5594	18.5594	18.5594	18.0866	18.0866	18.0866	17.2411	17.2411	17.2411	17.0698	17.0698	17.0698	21.5364	21.5364	21.5364	13.4243	13.4243	13.4243	19.4124	19.4124	19.4124	18.1656	18.1656	18.1656	20.9401	20.9401	20.9401	-	-	-	-	-	-	19.1393	19.1393	19.1393
460	21.3048	21.3048	21.3048	18.4425	18.4425	18.4425	18.047	18.047	18.047	17.2308	17.2308	17.2308	17.1038	17.1038	17.1038	21.3753	21.3753	21.3753	13.5627	13.5627	13.5627	19.3263	19.3263	19.3263	18.31	18.31	18.31	20.8113	20.8113	20.8113	-	-	-	-	-	-	19.0987	19.0987	19.0987
480	20.3304	19.8754	19.1009	17.4214	16.9664	16.1918	17.1695	16.7145	15.94	-	-	-	16.2938	15.8388	15.0643	20.3842	19.9292	19.1546	12.8511	12.3961	11.6216	18.4055	17.9505	17.1759	17.5972	17.1422	16.3677	19.8501	19.3951	18.6206	15.2912	14.8362	14.0617	-	-	-	18.2321	17.7401	16.9031
500	19.2872	18.8865	18.2034	16.4458	16.045	15.362	16.2177	15.8169	15.1339	-	-	-	15.4039	15.0031	14.3201	19.326	18.9252	18.2422	12.0544	11.6536	10.9706	17.4131	17.0123	16.3292	16.793	16.3922	15.7091	18.8195	18.4187	17.7357	-	-	-	-	-	-	17.2489	16.8481	16.165
520	17.8925	17.5638	17.0023	15.1246	14.7959	14.2344	14.9097	14.581	14.0195	-	-	-	14.1528	13.824	13.2625	17.9181	17.5894	17.0279	10.8915	10.5628	10.0013	16.0669	15.7382	15.1767	15.6173	15.2886	14.7271	17.4371	17.1084	16.5469	-	-	-	-	-	-	15.9109	15.5822	15.0207
540	17.2257	16.9297	16.4235	14.6167	14.3207	13.8145	14.3251	14.0291	13.5229	-	-	-	13.6204	13.3244	12.8182	17.2395	16.9435	16.4373	10.4429	10.1469	9.64073	15.4464	15.1504	14.6442	15.1514	14.8555	14.3492	16.7822	16.4862	15.98	-	-	-	12.7687	12.4727	11.9665	15.3407	15.0447	14.5385
560	16.8127	16.536	16.0622	14.3368	14.06	13.5863	13.9902	13.7135	13.2397	-	-	-	13.3337	13.0569	12.5831	16.8161	16.5393	16.0655	10.2357	9.95898	9.48521	15.0776	14.8009	14.3271	14.9232	14.6464	14.1726	16.3807	16.1039	15.6302	-	-	-	12.4967	12.2199	11.7461	15.07	14.7932	14.3194
580	16.5239	16.2598	15.8075	14.1198	13.8557	13.4033	13.7756	13.5115	13.0591	-	-	-	-	-	-	16.518	16.2539	15.8015	10.1413	9.87727	9.4249	14.8311	14.567	14.1147	14.8045	14.5404	14.088	-	-	-	-	-	-	12.3413	12.0772	11.6248	14.9004	14.6363	14.1839
600	16.2802	16.0265	15.5916	13.9438	13.6901	13.2552	13.6024	13.3487	12.9138	-	-	-	-	-	-	16.266	16.0123	15.5774	10.0815	9.82781	9.39296	14.6278	14.3742	13.9393	14.7176	14.4639	14.0291	-	-	-	-	-	-	-	-	-	14.7099	14.4563	14.0214
620	14.973	14.7815	14.4516	12.7011	12.5095	12.1796	12.3625	12.171	11.8411	-	-	-	-	-	-	14.9515	14.76	14.4301	8.94859	8.75709	8.42719	13.3595	13.168	12.8381	13.5554	13.3639	13.034	-	-	-	-	-	-	-	-	-	13.472	13.2805	12.9506
640	14.1953	14.0392	13.769	11.9847	11.8286	11.5585	11.6491	11.493	11.2228	-	-	-	-	-	-	14.1674	14.0113	13.7412	8.33623	8.18014	7.91	12.6191	12.463	12.1929	12.9118	12.7557	12.4856	-	-	-	-	-	-	-	-	-	12.7452	12.5891	12.3189
660	13.3955	12.9241	12.2474	11.2435	10.7721	10.0954	10.9108	10.4394	9.76268	-	-	-	-	-	-	13.3621	12.8907	12.214	7.69362	7.2222	6.5455	11.8553	11.3838	10.7071	12.2364	11.765	11.0883	-	-	-	-	-	-	-	-	-	12.015	11.577	10.9438
680	13.3605	12.8892	12.2126	11.2645	10.7932	10.1166	10.9348	10.4634	9.78683	-	-	-	-	-	-	13.3224	12.8511	12.1745	7.8082	7.33686	6.66027	11.8549	11.3836	10.707	12.3169	11.8456	11.169	-	-	-	-	-	-	-	-	-	11.9361	11.4648	10.7882
700	13.3267	12.8555	12.179	11.2843	10.8131	10.1366	10.9575	10.4863	9.80983	-	-	-	-	-	-	13.2846	12.8134	12.1369	7.91695	7.44572	6.76924	11.8545	11.3833	10.7068	12.3905	11.9192	11.2428	-	-	-	-	-	-	-	-	-	11.9355	11.4643	10.7878
a 150 m thick serpentine layer, High Interaction case
b 300 m thick serpentine layer, High Interaction case
c 600 m thick serpentine layer, High Interaction case
[truncated: 2 more columns]
