# Supplementary material for: Tracing fluid transfers in subduction zones: an integrated thermodynamic and δ 18 O fractionation modelling approach
Source: Copernicus journal article supplement (doi:10.5194/se-11-307-2020), 2020-03-10
Supplement: Supplementary file 2 [file se-11-307-2020-supplement.zip]

Archive with 6 entries (6 files):
- S1_tc55Serp.txt
- S3_Results.xlsx
- S2_InputData.docx
- se-11-307-2020-supplement-title-page.pdf
- S4_Discussion.xlsx
- S2_InputData.pdf
