# Supplementary material for: Tracing fluid transfers in subduction zones: an integrated thermodynamic and δ 18 O fractionation modelling approach
Source: Copernicus journal article supplement (doi:10.5194/se-11-307-2020), 2020-03-10
Supplement: Supplementary file 2 [file se-11-307-2020-supplement.zip › S2_InputData.pdf]

**Table S2.1.** Input values used in the calculation for the *Column 1*. The parameter name refers to the *PTloop* input file *PTlin*.

| Description                           | Parameter name                       | Value and further comments                                                                                                                         |
|---------------------------------------|--------------------------------------|----------------------------------------------------------------------------------------------------------------------------------------------------|
| <b>ROCK 1</b>                         |                                      |                                                                                                                                                    |
| Name Rock1                            | SAMP                                 | altered MORB ( <i>after Staudigel et al., 1996</i> )                                                                                               |
| Thickness (m)                         | THIC                                 | 1000                                                                                                                                               |
| Density (kg/m <sup>3</sup> )          | DENS                                 | 3300                                                                                                                                               |
| Starting bulk $\delta^{18}\text{O}$   | BULO                                 | 9.0                                                                                                                                                |
| Fluid phase to be fractionated        | FLUI                                 | water.fluid ( <i>named as in the thermodynamic database</i> )                                                                                      |
| Transferred fluid fraction to Rock2   | INTE ( <i>1<sup>st</sup> value</i> ) | 0.00001, 0.5, 0.99999 ( <i>NI, PI, HI</i> )                                                                                                        |
| Fluid fraction leaving the system     | INTE ( <i>2<sup>nd</sup> value</i> ) | 0.99999, 0.5, 0.00001 ( <i>NI, PI, HI</i> )                                                                                                        |
| Thermodynamic database                | THDB                                 | tc55 ( <i>distributed with Theriak-Domino 04.02.2017</i> )                                                                                         |
| Oxide wt% list                        | SYST                                 | SiO <sub>2</sub> TiO <sub>2</sub> Al <sub>2</sub> O <sub>3</sub> FeO Fe <sub>2</sub> O <sub>3</sub> MnO MgO CaO Na <sub>2</sub> O K <sub>2</sub> O |
| Starting bulk composition (oxide wt%) | BULK                                 | 43.47 1.06 14.74 5.98 0.00 0.00 6.32 12.22 1.96 0.53                                                                                               |
| Starting moles of water               | NH2O                                 | 0.58 ( <i>set as saturation</i> )                                                                                                                  |
| Moles of structural oxygen            | NOFI                                 | ? ( <i>automatically calculated by Theriak</i> )                                                                                                   |
| Moles of excess carbon                | NCFI                                 | 0.063                                                                                                                                              |
| Moles of excess oxygen                | NEXO                                 | 0.00                                                                                                                                               |
| <b>ROCK 2</b>                         |                                      |                                                                                                                                                    |
| Name Rock 2                           | SAMP                                 | terrigenous sediment ( <i>Plank and Langmuir, 1998</i> )                                                                                           |
| Thickness (m)                         | THIC                                 | 175                                                                                                                                                |
| Density (kg/m <sup>3</sup> )          | DENS                                 | 2800                                                                                                                                               |
| Starting bulk $\delta^{18}\text{O}$   | BULO                                 | 25                                                                                                                                                 |
| Fluid phase to be fractionated        | FLUI                                 | water.fluid ( <i>named as in the thermodynamic database</i> )                                                                                      |
| Fluid fraction leaving the system     | INTE                                 | 1                                                                                                                                                  |
| Thermodynamic database                | THDB                                 | tc55 ( <i>distributed with Theriak-Domino 04.02.2017</i> )                                                                                         |
| Oxide wt% list                        | SYST                                 | SiO <sub>2</sub> TiO <sub>2</sub> Al <sub>2</sub> O <sub>3</sub> FeO Fe <sub>2</sub> O <sub>3</sub> MnO MgO CaO Na <sub>2</sub> O K <sub>2</sub> O |
| Starting bulk composition (oxide wt%) | BULK                                 | 49.80 0.60 14.70 7.30 0.00 0.00 3.10 3.50 3.10 3.60                                                                                                |
| Starting moles of water               | NH2O                                 | 0.44 ( <i>set as saturation</i> )                                                                                                                  |
| Moles of structural oxygen            | NOFI                                 | ? ( <i>automatically calculated by Theriak</i> )                                                                                                   |
| Moles of excess carbon                | NCFI                                 | 0.00                                                                                                                                               |
| Moles of excess oxygen                | NEXO                                 | 0.00                                                                                                                                               |
| <b>Common parameters</b>              |                                      |                                                                                                                                                    |
| Oxygen isotope fractionation factors  | DODB                                 | DBOXYGEN2.0.3 ( <i>Vho et al., in review</i> )                                                                                                     |
| Solid phase(s) to be fractionated     | FRAC                                 | GARNET ( <i>named as in the thermodynamic database</i> )                                                                                           |
| <b>P-T path parameters</b>            |                                      |                                                                                                                                                    |
| T (°C) and P (bar) of a fixed step    | STEP                                 | 350 13000                                                                                                                                          |
| T (°C) and P (bar) of a fixed step    | STEP                                 | 400 16000                                                                                                                                          |
| T (°C) and P (bar) of a fixed step    | STEP                                 | 500 20000                                                                                                                                          |
| T (°C) and P (bar) of a fixed step    | STEP                                 | 600 23000                                                                                                                                          |
| T (°C) and P (bar) of a fixed step    | STEP                                 | 700 26000                                                                                                                                          |
| Nb. of intermediate temperature steps | STPT                                 | 16                                                                                                                                                 |
| Nb. of intermediate pressure steps    | STPP                                 | 16                                                                                                                                                 |

**Table S2.2.** Input values used in the calculation for the *Column 2*. The parameter name refers to the *PTloop* input file *PTlin*.

| Description                           | Parameter name                       | Value and further comments                                                                                                                         |
|---------------------------------------|--------------------------------------|----------------------------------------------------------------------------------------------------------------------------------------------------|
| <b>ROCK 1</b>                         |                                      |                                                                                                                                                    |
| Name Rock1                            | SAMP                                 | fresh MORB ( <i>Gale et al., 2013</i> )                                                                                                            |
| Thickness (m)                         | THIC                                 | 1000                                                                                                                                               |
| Density (kg/m <sup>3</sup> )          | DENS                                 | 3300                                                                                                                                               |
| Starting bulk $\delta^{18}\text{O}$   | BULO                                 | 5.7                                                                                                                                                |
| Fluid phase to be fractionated        | FLUI                                 | water.fluid ( <i>named as in the thermodynamic database</i> )                                                                                      |
| Transferred fluid fraction to Rock2   | INTE ( <i>1<sup>st</sup> value</i> ) | 0.00001, 0.5, 0.99999 ( <i>NI, PI, HI</i> )                                                                                                        |
| Fluid fraction leaving the system     | INTE ( <i>2<sup>nd</sup> value</i> ) | 0.99999, 0.5, 0.00001 ( <i>NI, PI, HI</i> )                                                                                                        |
| Thermodynamic database                | THDB                                 | tc55 ( <i>distributed with Theriak-Domino 04.02.2017</i> )                                                                                         |
| Oxide wt% list                        | SYST                                 | SiO <sub>2</sub> TiO <sub>2</sub> Al <sub>2</sub> O <sub>3</sub> FeO Fe <sub>2</sub> O <sub>3</sub> MnO MgO CaO Na <sub>2</sub> O K <sub>2</sub> O |
| Starting bulk composition (oxide wt%) | BULK                                 | 50.47 1.68 14.70 10.43 0.00 0.00 7.58 11.39 2.79 0.16                                                                                              |
| Starting moles of water               | NH2O                                 | 0.65 ( <i>set as saturation</i> )                                                                                                                  |
| Moles of structural oxygen            | NOFI                                 | ? ( <i>automatically calculated by Theriak</i> )                                                                                                   |
| Moles of excess carbon                | NCFI                                 | 0.00                                                                                                                                               |
| Moles of excess oxygen                | NEXO                                 | 0.00                                                                                                                                               |
| <b>ROCK 2</b>                         |                                      |                                                                                                                                                    |
| Name Rock 2                           | SAMP                                 | carbonate sediment ( <i>Plank, 2014</i> )                                                                                                          |
| Thickness (m)                         | THIC                                 | 75                                                                                                                                                 |
| Density (kg/m <sup>3</sup> )          | DENS                                 | 2800                                                                                                                                               |
| Starting bulk $\delta^{18}\text{O}$   | BULO                                 | 25                                                                                                                                                 |
| Fluid phase to be fractionated        | FLUI                                 | water.fluid ( <i>named as in the thermodynamic database</i> )                                                                                      |
| Fluid fraction leaving the system     | INTE                                 | 1                                                                                                                                                  |
| Thermodynamic database                | THDB                                 | tc55 ( <i>distributed with Theriak-Domino 04.02.2017</i> )                                                                                         |
| Oxide wt% list                        | SYST                                 | SiO <sub>2</sub> TiO <sub>2</sub> Al <sub>2</sub> O <sub>3</sub> FeO Fe <sub>2</sub> O <sub>3</sub> MnO MgO CaO Na <sub>2</sub> O K <sub>2</sub> O |
| Starting bulk composition (oxide wt%) | BULK                                 | 32.36 0.40 8.78 2.91 0.00 0.00 1.45 23.16 1.96 1.66                                                                                                |
| Starting moles of water               | NH2O                                 | 0.20 ( <i>set as saturation</i> )                                                                                                                  |
| Moles of structural oxygen            | NOFI                                 | ? ( <i>automatically calculated by Theriak</i> )                                                                                                   |
| Moles of excess carbon                | NCFI                                 | 0.41                                                                                                                                               |
| Moles of excess oxygen                | NEXO                                 | 0.00                                                                                                                                               |
| <b>Common parameters</b>              |                                      |                                                                                                                                                    |
| Oxygen isotope fractionation factors  | DODB                                 | DBOXYGEN2.0.3 ( <i>Vho et al., in review</i> )                                                                                                     |
| Solid phase(s) to be fractionated     | FRAC                                 | GARNET ( <i>named as in the thermodynamic database</i> )                                                                                           |
| <b>P-T path parameters</b>            |                                      |                                                                                                                                                    |
| T (°C) and P (bar) of a fixed step    | STEP                                 | 350 13000                                                                                                                                          |
| T (°C) and P (bar) of a fixed step    | STEP                                 | 400 16000                                                                                                                                          |
| T (°C) and P (bar) of a fixed step    | STEP                                 | 500 20000                                                                                                                                          |
| T (°C) and P (bar) of a fixed step    | STEP                                 | 600 23000                                                                                                                                          |
| T (°C) and P (bar) of a fixed step    | STEP                                 | 700 26000                                                                                                                                          |
| Nb. of intermediate temperature steps | STPT                                 | 16                                                                                                                                                 |
| Nb. of intermediate pressure steps    | STPP                                 | 16                                                                                                                                                 |

**Table S2.3.** Input values used for the ultramafic fluid influx as in the *PTloop* input file *Fluid\_in*.

| P (bar) | T (°C) | Mass of input fluid (kg) |       |        | $\delta^{18}\text{O}$ (‰ vs. VSMOW) |
|---------|--------|--------------------------|-------|--------|-------------------------------------|
|         |        | 150 m                    | 300 m | 600 m  |                                     |
| 13000   | 350    | 0                        | 0     | 0      | -                                   |
| 14500   | 375    | 0                        | 0     | 0      | -                                   |
| 16000   | 400    | 0                        | 0     | 0      | -                                   |
| 16800   | 420    | 0                        | 0     | 0      | -                                   |
| 17600   | 440    | 0                        | 0     | 0      | -                                   |
| 18400   | 460    | 0                        | 0     | 0      | -                                   |
| 19200   | 480    | 7800                     | 15600 | 31200  | 4.5                                 |
| 20000   | 500    | 0                        | 0     | 0      | -                                   |
| 20600   | 520    | 0                        | 0     | 0      | -                                   |
| 21200   | 540    | 0                        | 0     | 0      | -                                   |
| 21800   | 560    | 0                        | 0     | 0      | -                                   |
| 22400   | 580    | 0                        | 0     | 0      | -                                   |
| 23000   | 600    | 0                        | 0     | 0      | -                                   |
| 23600   | 620    | 0                        | 0     | 0      | -                                   |
| 24200   | 640    | 0                        | 0     | 0      | -                                   |
| 24800   | 660    | 25350                    | 50700 | 101400 | 4.5                                 |
| 25400   | 680    | 0                        | 0     | 0      | -                                   |
| 26000   | 700    | 0                        | 0     | 0      | -                                   |

**Table S2.4.** Input values used in the calculation for the *mantle wedge hydration*. The parameter name refers to the *PTloop* input file *PTlin*.

| Description                           | Parameter name               | Value and further comments                                                                                                                         |
|---------------------------------------|------------------------------|----------------------------------------------------------------------------------------------------------------------------------------------------|
| <b>ROCK 1</b>                         |                              |                                                                                                                                                    |
| Name Rock1                            | SAMP                         | PeridotiteV1 (Walter, 1998)                                                                                                                        |
| Thickness (m)                         | THIC                         | 333333                                                                                                                                             |
| Density (kg/m <sup>3</sup> )          | DENS                         | 3150                                                                                                                                               |
| Starting bulk $\delta^{18}\text{O}$   | BULO                         | 5.5                                                                                                                                                |
| Fluid phase to be fractionated        | FLUI                         | water.fluid (named as in the thermodynamic database)                                                                                               |
| Transferred fluid fraction to Rock2   | INTE (1 <sup>st</sup> value) | 0.99999                                                                                                                                            |
| Fluid fraction leaving the system     | INTE (2 <sup>nd</sup> value) | 0.00001                                                                                                                                            |
| Thermodynamic database                | THDB                         | tc55 (distributed with Theriak-Domino 04.02.2017)                                                                                                  |
| Oxide wt% list                        | SYST                         | SiO <sub>2</sub> TiO <sub>2</sub> Al <sub>2</sub> O <sub>3</sub> FeO Fe <sub>2</sub> O <sub>3</sub> MnO MgO CaO Na <sub>2</sub> O K <sub>2</sub> O |
| Starting bulk composition (oxide wt%) | BULK                         | 44.50 0.00 3.59 8.10 0.0 0.0 39.22 0.00 0.00 0.00                                                                                                  |
| Starting moles of water               | NH2O                         | 0.00                                                                                                                                               |
| Moles of structural oxygen            | NOFI                         | ? (automatically calculated by Theriak)                                                                                                            |
| Moles of excess carbon                | NCFI                         | 0.00                                                                                                                                               |
| Moles of excess oxygen                | NEXO                         | 0.00                                                                                                                                               |
| <b>ROCK 2</b>                         |                              |                                                                                                                                                    |
| Name Rock 2                           | SAMP                         | PeridotiteV2 (Walter, 1998)                                                                                                                        |
| Thickness (m)                         | THIC                         | 1666667                                                                                                                                            |
| Density (kg/m <sup>3</sup> )          | DENS                         | 3150                                                                                                                                               |
| Starting bulk $\delta^{18}\text{O}$   | BULO                         | 5.5                                                                                                                                                |
| Fluid phase to be fractionated        | FLUI                         | water.fluid (named as in the thermodynamic database)                                                                                               |
| Fluid fraction leaving the system     | INTE                         | 1                                                                                                                                                  |
| Thermodynamic database                | THDB                         | tc55 (distributed with Theriak-Domino 04.02.2017)                                                                                                  |
