# Supplementary material for: Tracing fluid transfers in subduction zones: an integrated thermodynamic and δ 18 O fractionation modelling approach
Source: Copernicus journal article supplement (doi:10.5194/se-11-307-2020), 2020-03-10
Supplement: Supplementary file 2 [file se-11-307-2020-supplement.zip › S4_Discussion.xlsx]

## Sheet: Effect of min. assemblage
The limited effect of changing assemblages on the variation in oxygen isotope composition can be evaluated with an extreme example. A granite at 700 °C and 0.3 GPa (Stage1) is subducted to 700 °C and 2.5 GPa. If lack of hydration prevents the rock from re-equilibration, the granite can preserve a metastable mineral assemblage during subduction. Assuming a pervasive hydration at 700 °C and 2.5 GPa…
Starting bulk composition (Chappell and White (1992): I- and S-type granites in the Lachlan Fold Belt)
Component	wt%	Mol of element			Stage1: P = 0.3 GPa, T = 700 °C					Stage2: P = 2.5 GPa, T = 700 °C
SiO2	70.9	1.18			Phase	wt%	Mol	δ18O		Phase	wt%	Mol	δ18O
Al2O3	14	0.2746			Quartz	34.2	0.5601	13.9		Quartz	39.3	0.6508	13.1
Na2O	2.5	0.0807			Plagioclase	27.7	0.1017	12.8		Phengite	35.7	0.881	11
K2O	4.1	0.0871			K-feldspar	23.6	0.0843	12.7		Jadeite	24.05	0.1126	10.1
MgO	1.2	0.0298			Biotite	7.5	0.0157	10.7		Garnet	0.6	0.0012	9.7
CaO	1.9	0.0339			Cordierite	6.2	0.0098	11.7		Rutile	0.4	0.005	7.8
TiO2	0.4	0.005			Ilmenite	0.8	0.005	7.2
MnO	0.1	0.0014
FeO	3	0.0418
Bulk δ18O	12 ‰
Thermodynamic database: Berman, 1988 (as distributed with Theriak-Domino 04.02.2017)
Oxygen isotope fractionation database: DBOXYGEN2.0.3 (Vho et al., 2019)

## Sheet: Mantle Wedge Infiltration
Volume 1
1000 m x 1000 m (HxL, scaled 1:3 in the calculation)
	1000	5000	10000	50000	100000	250000	500000	750000	1000000	2500000	5000000	7500000
bulk d18O	5.51	5.54	5.59	5.92	6.3	7.28	8.5	9.39	10.06
							saturated
Volume 2
2000 m x 3000 m (HxL,scaled 1:3 in the calculation, V1 removed)
	1000	5000	10000	50000	100000	250000	500000	750000	1000000	2500000	5000000	7500000
bulk d18O	5.5	5.5	5.5	5.5	5.5	5.5	5.7	5.94	6.21
											saturated
